1           **Reconstruction of *Escherichia coli* ancient diversification by**  
2           **layered phylogenomics and polymorphism fingerprinting**

3   **José M<sup>a</sup> González-Alba<sup>1,2</sup>, Fernando Baquero<sup>1,2,3</sup>, Rafael Cantón<sup>1,4</sup> and Juan Carlos**  
4   **Galán<sup>\*1,2,3</sup>**

5

6   <sup>1</sup>Servicio de Microbiología. Hospital Universitario Ramón y Cajal and Instituto Ramón  
7   y Cajal de Investigación Sanitaria (IRYCIS), Madrid, Spain.

8   <sup>2</sup>CIBER en Epidemiología y Salud Pública (CIBERESP) Madrid, Spain

9   <sup>3</sup>Unidad de Resistencia a Antibióticos y Virulencia Bacteriana, Madrid, Spain

10   <sup>4</sup>Red Española de Investigación en Patología Infecciosa (REIPI), Madrid, Spain.

11

12   **Short title:** Ancestral evolutionary reconstruction of *Escherichia coli*

13

14   **\*Corresponding author**

15   **E-mail:** juancarlos.galan@salud.madrid.org (JCG)

17 **Abstract**

18 The rapidly increasing availability of whole genomes provides the opportunity to reach  
19 an updated comprehensive view of bacterial evolution. The staggered diversification of  
20 evolutionary processes, based on the combined strategy of layered phylogenomics and  
21 polymorphism fingerprinting, give a new perspective in phylogenetic reconstructions.  
22 Layered phylogenomics is based on the assignation of genes according to five different  
23 evolutionary layers: minimal genome, genus-core genome, species-core genome,  
24 phylogroup-core genome and phylogroup-flexible genome. Polymorphism fingerprinting  
25 is based on the detection of conserved positions in each phylogenetic group but differing  
26 from those of their hypothetical ancestors. This approach was applied to *Escherichia coli*  
27 because there are unresolved evolutionary questions, although has been highly studied.  
28 Phylogenetic analysis based on 6,220 full genomes, identified three *E. coli* root lineages,  
29 defined as D, EB1A and FGB2. A new phylogroup, called G was detected near to  
30 phylogroup B2. The closest phylogroup to ancestral *E. coli* was phylogroup D, whereas  
31 E and F were the closest ones in their respective lineages; moreover, A and B2 were the  
32 most distant phylogroups in EB1A and FGB2 respectively. We suspect that EB1A and  
33 FGB2 lineages represent different adaptive strategies. In the deepest branch of EB1A  
34 lineage, the number of accumulated mutations was lower than in recent branches, whereas  
35 in FGB2 lineage the opposite occurred. The FGB2 lineage was enriched in genes related  
36 to host colonization-pathogenicity and toxin-antitoxin systems (such as *hipA*), whereas  
37 B1A sub-lineage acquired functions related to uptake and metabolism of carbohydrates  
38 (such as *bgl*, *mng* or *xlyE*). This new combined strategy shows a detailed staggered  
39 evolutionary reconstruction, which help us to understand the deepest events and the  
40 selection forces have driven *E. coli* diversification. This approach could add resolution in  
41 the reconstruction of the evolutionary trajectories of other microorganisms.

## 42 **Author summary.**

43 Phylogeny based on whole genome provides the opportunity to study the history of eco-  
44 adaptive diversification of any bacterial taxon. Different strategies have been proposed  
45 for knowing the evolutionary trajectories in some species, such as *Escherichia coli*;  
46 however, these analyses were based on a limited number of sequences, and sometimes  
47 the evolutionary reconstructions reached clashed positions, especially in the ancestral  
48 inferences. For adding resolution in evolutionary reconstructions, we propose a  
49 combination of approaches, such as layered phylogenomics based on the use of different  
50 set of genes corresponding to the successive evolutionary steps, and polymorphism  
51 fingerprinting which detects hallmarks of the ancient mutations. We propose to use *E.*  
52 *coli* because it is paradigmatic example of the evolutionary inconsistencies despite being  
53 a microorganism with enough evolutionary analysis. Three ancestral lineages were  
54 established with this strategy and the staggered reconstruction about the origin and  
55 diversification of *E. coli* phylogroups was inferred. Moreover, in the context of this study,  
56 a new *E. coli* phylogroup was defined. The main lineages represent different adaptive  
57 strategies, one lineage gained genes involved in pathogenicity, and another one acquired  
58 genes allowing the obtainment of energy from different sources.

59

60

## 61 **Introduction**

62 Since the first description by Theodore Escherich described of *Escherichia coli* in 1885,  
63 several generations of researchers have been fascinated by this organism. *E. coli* has been  
64 extensively used as a model to understand bacterial adaptability [1, 2]. The population  
65 diversity of *E. coli* was initially recognized in four main phylogroups (A, B1, B2 and D)  
66 [3]. In the following years, the increasing number of available sequences allowed the  
67 identification of three new phylogroups (C, E, and F) and five cryptic clades, revealing  
68 that the population structure of *E. coli* was more complex than initially suggested [4].  
69 When the first whole *E. coli* genome was sequenced in 1997, a new possibility in the  
70 comparative genomic field was perceived for this microorganism [5]. The growing  
71 availability of a large amount of whole *E. coli* genomes provided an unprecedented level  
72 of discrimination and the opportunity to perform solid evolutionary reconstructions [6].  
73 Traditionally, the bacterial genomes have been distinguished in a core genes pool  
74 encoding the basic cellular functions, and a flexible genes pool conferring strain-,  
75 pathotype- or ecotypes-specific characteristics which allow adaptation to special  
76 conditions [7]. For instance, from the first available studies based on a limited number of  
77 sequences, ranging from 20-61 genomes [8, 9], until the most recent ones using fewer  
78 than 250 genomes [10, 11], several discrepancies particularly regarding the origin and  
79 ancestral position of the different lineages are still unresolved. Some groups considered  
80 phylogroup B2 to be the most ancestral *E. coli* phylogroup [8, 2, 10], whereas other  
81 studies proposed phylogroup D was in this ancestral position [12]. On the other hand, it  
82 was also suggested that two D sub-lineages could be the origin of two main evolutionary  
83 trajectories leading to lineages A/B1/C/E and B2/F [13, 6, 14]. Other researchers  
84 suggested that phylogroup B1 was the origin of E and A phylogroups [1] or proposed a

85 paraphyletic origin for phylogroup A [15]. Other works questioned the differentiation of  
86 phylogroup C [12, 16].

87 To contribute to answer these unresolved evolutionary questions by adding resolution in  
88 the evolutionary reconstructions, a new strategy was proposed to elucidate the successive  
89 steps in the *E. coli* diversification. Our strategy was a combination of two approaches.  
90 One of them, coined “layered phylogenomics” (LP) is based on stratified phylogenetic  
91 analysis of genes representing successive evolutionary steps. The layers are divided in  
92 minimal genome, genus-core genome species-core genome, phylogroup-core genome and  
93 phylogroup-flexible genome (Fig 1). The LP approach was complemented with the  
94 “polymorphism fingerprinting” (PF) approach, based on the identification of the  
95 conserved positions in each phylogenetic group, that are variable with respect to their  
96 hypothetical ancestor. This strategy could allow a visual representation of the staggered  
97 diversification processes of *E. coli*.

98

## 99 **Results**

### 100 **Defining the framework for the evolutionary reconstruction of *E. coli***

101 At the time of starting this work, the number of available *E. coli* sequences in the genome  
102 database from NCBI was 6,266 genomes. To ascertain if all *E. coli* genomes were  
103 correctly identified, the core genome of *Escherichia* genus was established in 189 genes  
104 shared by all members. The phylogenetic tree constructed with the concatenated sequence  
105 of these genes revealed that 40 genomes were wrongly classified as *E. coli* mainly  
106 belonged to cryptic clade I, the closest related lineage to *E. coli* (S1 Fig). Moreover,  
107 another six genomes were also excluded because their poor sequencing. Once the  
108 remaining 6,220 genomes were confirmed, *E. coli* core genome was established in 1,027  
109 genes. A phylogenetic tree was constructed with these genes and was used as the reference

110 phylogeny. This tree confirmed most of the previously known *E. coli* phylogroups, but  
111 we were unable to unequivocally separate phylogroup C from B1. On the contrary, a new  
112 phylogroup was found, which we proposed to designate as phylogroup G, following the  
113 pre-established denomination (Fig 2A). The estimation of evolutionary divergences over  
114 sequences pairs between phylogroups reinforced the identification of phylogroup G (Fig  
115 2B). This phylogroup is a monophyletic clade with low diversity, located next to  
116 phylogroup B2. Two *E. coli* genomes (KTE146 and EPEC-503225) were located in an  
117 intermediate position between the node of *Escherichia* cryptic clade I and the origin of  
118 the *E. coli* diversification. Nowadays, these sequences could be used as better candidates  
119 than cryptic clade I in the ancestral reconstruction of *E. coli* diversification as the  
120 evolutionary distance between cryptic clade I and *E. coli* origin is too large to be  
121 considered as the most recent ancestor.

122 The *E. coli* core genome phylogeny also suggested three root lineages. They were  
123 denominated as EB1A (including the E, B1 and A phylogroups), FGB2 (including F, G,  
124 and B2 phylogroups) and D (including phylogroup D). Among the phylogroups allocated  
125 in the lineage EB1A, 859 sequences were identified as phylogroup E (average  
126 chromosomal size 5,364.150), 1,995 as phylogroup B1 (average chromosomal size  
127 5,197.510) and 1,296 as phylogroup A (average chromosomal size 4,977.757).  
128 Meanwhile, in lineage FGB2 the distribution was: 124 sequences corresponded to  
129 phylogroup F (average chromosomal size 5,321.950), 55 to phylogroup G (average  
130 chromosomal size 5,245.213) and 1,455 to phylogroup B2 (average chromosomal size  
131 5,138.164). Finally, 424 sequences were attributed to phylogroup D (average  
132 chromosomal size 5,252.449) and 10 sequences could not be allocated to any known  
133 phylogroup (note that the number of genomes per phylogroup does not necessarily reflect

134 the *E. coli* population distribution). A representation of chromosomal sizes is shown in  
135 S2 Fig.

136

137 **LP-PF strategy yield detailed evolutionary reconstruction of the origin of *E. coli***  
138 **phylogroups**

139 Now, we envisaged elucidating the evolutionary steps leading to such phylogeny using  
140 the LP approach, detailed in the Material and Methods section and S3 Fig.

141 In first layer corresponding to known as minimal genome, only 51 among the previously  
142 described genes [17, 18] were found in all *E. coli* genomes. In *Escherichia* genus-core  
143 genome (second layer), 189 genes were found; however, from this number we subtracted  
144 the genes from minimal genome, in order to reconstruct the corresponding phylogenetic  
145 tree based on 138 genes of genus-core genome. In the third layer, the *E. coli* species-core  
146 genome was reconstructed using 838 genes, after excluding the 189 from *Escherichia*  
147 genus-core genome. The LP approach revealed identical topology with the three set of  
148 genes used (S4A Fig) suggesting that this approach was still insufficient to infer the first  
149 steps in the differentiation and diversification of *E. coli*. Consequently, we conceived the  
150 possibility of complementing recognizing patterns of single nucleotide polymorphisms  
151 (SNPs) accumulated along the *E. coli* evolutionary steps used in the above section. These  
152 SNPs could be used as high-support markers (fingerprinting) in the ancestral  
153 reconstruction of phylogenetic groups, which we called the phylogroup “polymorphism  
154 fingerprinting” (PF) approach, adding resolution to the reconstruction observed with only  
155 LP approach. As expected, the percentages of invariable positions were higher among the  
156 genes belonging to minimal genome, 81% (42,495 invariable positions/52,404 total  
157 positions), followed by 78% (150,108/191,766) among the genes classified as  
158 *Escherichia* genus-core and 75% (601,412/801,883) in *E. coli* species-core genome. The

159 phylogroup- or lineage-specific changes present in all genomes were identified. A total  
160 number of 14 (3‰), 88 (5‰) or 490 (8‰) mutations were defined as specific in the  
161 minimal genome, *Escherichia* genus-core genome and *E. coli* species-core genome  
162 respectively. Subsequently the numbers of specific changes were overprinted in the  
163 corresponding branches of the phylogenetic trees (S4B Fig).

164 The combined strategy (LP-PF) was suggestive of a more detailed evolutionary scenario,  
165 from the deepest branches to reaching the latest events in the differentiation processes of  
166 the classic *E. coli* phylogroups. Therefore, we can propose a staggered evolutionary  
167 scenario in Fig 3. Lineage D, with phylogroup D as unique member showed fewer  
168 changes with respect to known most recent common ancestor (MRCA) than other  
169 lineages, and then we assumed that it was the last phylogroup separated from the ancestral  
170 genome and consequently the lineage more closely related to *E. coli* origin. This LP-PF  
171 strategy also allowed us to infer the successive diversification steps in EB1A and FGB2  
172 lineages. In FGB2 lineage, we were able to identify phylogroup F as the last group  
173 separated from FGB2 root but not to identify which one was the first diverging  
174 phylogroup (B or G). Reconstruction of EB1A lineage only allowed us to suggest the  
175 appearance of the EB1A lineage as a non-ancient step and the subsequent separation of  
176 the B1A sub-lineage (Fig 3).

177 To reinforce this evolutionary scenario, we explore the gain and loss of ancient genes  
178 reconstructing the hypothetical ancient *E. coli* core genome based on the phylogroup-core  
179 genomes, the fourth evolutionary layer in our model [19]. The gene content of  
180 phylogroups-core genomes ranged from 741 to 2,715 genes, corresponding to  
181 phylogroups A and G respectively, once the 1,027 genes corresponding to *E. coli* core  
182 genome were excluded. A set of 2,052 genes constituting this ancient genome was  
183 searched in all individual genomes of each phylogroup. These data permitted calculation



184 of the percentage of genomes in each phylogroup carrying 95-99% of ancient genes.  
185 When the threshold of ancient genes was 95%, no differences among phylogroups were  
186 detectable; however, the step-wise increase of this threshold towards 99% progressively  
187 revealed differences among them (Fig 4). Consistently with the previous analysis,  
188 phylogroup D maintained the highest percentage of strains sharing 99% of ancient genes,  
189 supporting that this phylogroup was the ancestral one. Now, phylogroup B2 was the first  
190 in FGB2 lineage to be separated from the hypothetical ancestral genome, and phylogroup  
191 F was the last one, confirming the previous results. Inside the EB1A lineage, phylogroup  
192 A was the first differentiated member, while phylogroup was E was the last one separated  
193 from the ancestral genome. Moreover, EPEC-503225 and KTE146 strains carried 99% of  
194 the ancestral genes, supporting our proposal that these strains could represent the best-to-  
195 the-present known close ancestors of *E. coli*.

196

### 197 **Differences in the evolutionary pathways of the major *E. coli* root lineages**

198 The obtained phylogenetic reconstructions suggest that three lineages were involved in  
199 the initial diversification steps. To investigate if the diversification of the lineages could  
200 be associated with particular lifestyles and evolutionary strategies, several genomic  
201 markers were analyzed such as the number of mutations per site, ancient recombination  
202 between and within phylogroups, and the gain or loss of genes.

203 The accumulated mutations per site revealed that, independently from the layers  
204 analyzed, the EB1A lineage presented a number of mutations below the mean value,  
205 whereas the FGB2 lineage showed values above the mean (S5 Fig). This indicates a  
206 higher mutation frequency in the FGB2 root lineage compared with the EB1A lineage. In  
207 addition, the number of accumulated mutations in the deepest branch of FGB2 lineage  
208 was lower than in recent branches, whereas in EB1A lineage the opposite occurred; more

209 changes were accumulated in the deepest branch. The analysis of ancient recombination  
210 events revealed that around 3% of the genes belonging to *E. coli* core genome had  
211 suffered recombination events. However, the recombination frequency was not  
212 homogeneous across different phylogroups, and was more frequently found in  
213 phylogroups G and F (S6 Fig). Moreover, no ancient recombination events were detected  
214 in the phylogroup B2, belonging to FGB2 lineage. The results of accumulated mutations  
215 per site are similar without the suspected recombinant genes, as the effect of  
216 recombinatorial events is minimized when the number of genes analyzed increases [20].  
217 Finally, to find a possible signal that might reveal the different evolutionary strategies  
218 between two root lineages in *E. coli* was the study of the gain and loss of genes. Based  
219 on the Clusters of Orthologous Groups of proteins (COG), which classify the potential  
220 products of the studied genes in functional categories, we analysed four general categories  
221 (cell interactions, replication, metabolism, and other functions). Different patterns were  
222 observed between EB1A and FGB2 lineages in these established categories (Fig 5). In  
223 general, FGB2 lineage gained more genes related to cell interaction, metabolism and  
224 replication than EB1A lineage.

225

### 226 **Gain and loss of genes with assigned functions involved in the different adaptive** 227 **processes in the main lineages**

228 In the last sections, we describe the evidence we found of the evolutionary differences  
229 among the main *E. coli* lineages. Our next step was investigated the acquired or  
230 eliminated genes among the members of the same phylogroup or lineage, searching for  
231 possible phylogroup-specific ecological adaptations. Obviously, the three lineages should  
232 be compared with the *E. coli* ancestral genome, but this ancestral genome is no longer  
233 available (only two genomic sequences, EPEC-503225 and KTE146, could be close to

234 the *E. coli* ancestral genome). Therefore, as the closest densely populated phylogroup to  
235 ancestral *E. coli* genome was phylogroup D, this phylogroup/lineage was used as  
236 reference in these studies. In a first analysis, several independent acquisitions with respect  
237 to phylogroup D were identified in different branches suggesting convergent evolution  
238 events. For instance, the EB1A root lineage acquired *yafQ-dinJ*, a toxin-antitoxin system,  
239 and *creBC*, a functional two-component system. This last system, involved in  
240 peptidoglycan recycling, promotes increased resistance against colicins M and E2, and is  
241 also involved in bacterial fitness and biofilm development, especially in the presence of  
242 subinhibitory  $\beta$ -lactam concentrations. The *yafQ-dinJ* system was also acquired by the F  
243 phylogroup, and CreBC by the GB2 sublineage (Fig 6). As to adhesins, if the EB1A  
244 lineage acquired the *yra* operon, the GB2 sublineage lost *ycg*, *ycb* and *sfm* operons present  
245 in the putative ancestor phylogroup D.

246 Differences among lineages were also found with respect to genes involved in the  
247 uptake of energetic nutrients. The B1A sublineage acquired genes or operons encoding  
248 enzymes related to uptake of sugars. For instance, *bgl* operon encodes a  
249 phosphotransferase belonging to the *Glc*-family system is involved in the uptake of  $\beta$ -  
250 glucosides. Moreover, *mng* operon, belonging to the *Fru*-family, is involved in the uptake  
251 and metabolism of mannosyl-D-glycerate and *xlyE* is involved in the uptake of xylose  
252 [21]. Excess in phosphorylated sugar intermediates in B1A cells could be detrimental,  
253 causing growth inhibition [22], due to depletion of inorganic phosphate pools, which  
254 probably triggered the acquisition of the sugar efflux such as transporter encoded by *setA*,  
255 in the B1A sublineage [23]. However, the phylogroup E lost genes involved in the  
256 formation and processing of phosphorylated sugars such as xylulose 5-P, or ribose 5-P  
257 and ribulose 5-P. In addition, this phylogroup lost five genes involved in the fatty acid  
258 metabolism, suggesting deficiencies in phylogroup E for obtaining energy compared to

259 B1A sublineage. In the FGB2 lineage, only the *bgl* operon was acquired by GB2  
260 sublineage (Fig 6).

261 On the other hand, the B1A sublineage, from EB1A lineage, lost genes encoding  
262 key proteins involved in the uptake of metals as iron, manganese and molybdene,  
263 including proteins from the siderophore ABC transport system, metal-ABC transport  
264 (ECSMS35\_RS09855 to ECSMS35\_RS09880). Moreover, genes involved in the vitamin  
265 B12 and hemin metabolism were also lost (*hmuV*, ECSMS35\_RS191855 to  
266 ECSMS35\_RS19215). These genes, which might influence tissue colonization and  
267 pathogenicity, were essentially preserved in phylogroup E, suggesting that B1A  
268 sublineage could have evolved to less virulent variants compared to phylogroup E.

269 The FGB2 lineage lost genes involved in the detoxification of benzenic aldehydes  
270 (*yag* operon or *hca* operon) [24] and genes involved in survival in extreme conditions,  
271 such as acid pH (*hyF* operon), high temperatures and low osmolarity (*yhiM*) [25].  
272 Moreover, the phylogroup B2 lost genes with possible environmental functions, such as  
273 transport of melobiose (*melB*), utilization of cyanate as a source of nitrogen for growth  
274 (*cyn* operon) or resistance to arsenate (*ars* operon). Acquisition of toxin-antitoxin related  
275 genes was found in the FGB2 lineage. In GB2 sublineage, there was a gain of *hipA* gene,  
276 which belongs to HipBA toxin/antitoxin system, and where the overexpression of the  
277 *hipA* protein leads to multidrug tolerance in *E. coli* [26]. In addition to the *yafQ-dinJ*  
278 system previously commented, other duplications of toxin and antitoxin genes from  
279 different systems were found in phylogroup G (*yefM* and *phD* antitoxins or *symE* toxin).  
280 The *symE* gene, encoding a toxin belonging to type I toxin-antitoxin system, has probably  
281 evolved by gene duplication [27]. Phylogroup B2 lost genes involved in toxin-antitoxin  
282 systems (*tisAB/istR*, *hicAB* or *pemI/pemK*).

283

## 284 Discussion

285 *E. coli* is the most widely sequenced microorganism, and therefore the available material  
286 for tracing its evolutionary history is extremely abundant. However, there are discrepant  
287 aspects concerning *E. coli* phylogeny that have not been yet resolved. In this work,  
288 phylogenetic analysis of 6,220 full sequenced genomes, available in Genbank, was  
289 performed, offering some new perspectives about these open questions. During the first  
290 stages in the development of this work, some basic problems were found; for instance,  
291 around 90% of the sequenced *E. coli* genomes were not fully completed and they remain  
292 in draft [28]. If draft genomes should be or not removed from phylogenetic analysis is a  
293 matter of concern, as some genes could be lost [29]. However, the analysis of 32,000  
294 bacterial genomes turned out the sufficient quality of the drafts for phylogenetic purposes  
295 [28]. Only six genomes in our sampling were eliminated due to poor quality of the  
296 sequences. Another observed drawback was the misallocation of 40 genomes as *E. coli*  
297 in the database. The most common mistake was to identify as *E. coli* genomes those  
298 belonging to cryptic clade I (22/40). Consequently, these misallocated genomes were  
299 excluded for the phylogenetic *E. coli* reconstruction. The cryptic clade I was used as  
300 outgroup, but the intermediate links between cryptic clade I and *E. coli* identified during  
301 this work were used as the most recent common ancestor in the analysis of staggered  
302 diversification processes in *E. coli*.

303 In this work, *E. coli* core genome was reduced in around 318 genes with respect  
304 to the analysis using 61 complete genomes [9]. Although it represents a drastic reduction  
305 in the number of genes, they represent around 20% of the *E. coli* genome and probably  
306 this data is coincident with previous estimations [30]. Moreover, a new phylogenetic  
307 group was identified with high support value and evolutionary divergence with respect to  
308 known phylogroups were higher than between already established phylogroups. This new

309 phylogroup denominated as phylogroup G represented <1% of the total number of  
310 sequenced *E. coli* strains. The core genome in this new phylogroup (3,741 genes) was  
311 larger than those estimated in the previously known phylogroups (1,767-2,692 genes),  
312 but this result might be biased due to the low number of sequences belonging to this  
313 phylogroup. On the contrary, genomes initially described as phylogroup C could not be  
314 discriminated in our analysis from those of phylogroup B1. In a previous work published  
315 by our group, the phylogroup C was suspected to be composed of genomes arising by  
316 recombination between phylogroup A and B1 [16]. We could only identify members of  
317 phylogroup C as a subpopulation in phylogroup B1. On the other hand, three root lineages  
318 were defined. They were lineage D, the deepest one, EB1A and FGB2 lineages, both with  
319 three phylogenetic groups. This widely used phylogenetic reconstruction only offers the  
320 current population structure of *E. coli*, leaving the open questions, related to ancestral  
321 stepwise diversification and differentiation processes unresolved.

322 A new strategy for adding resolution in the evolutionary reconstruction of bacterial  
323 species combining two complementary approaches, layered phylogenomics and  
324 polymorphism fingerprinting, (LP-PF) is presented in this work. The LP approach was  
325 based on phylogenetic reconstructions with ensembles of genes corresponding to the  
326 different evolutionary stages. Those genes shared among the more separate bacterial  
327 species in the phylogenetic trees (the deepest branches) could correspond to the most  
328 ancestral genetic information (or paleome).

329 We examined the set of genes previously defined as minimal genome to find the ancestral  
330 traits that might cast a light about the origin of the *E. coli* species. Our interest was not to  
331 redefine the minimal genome, essentially encoding metabolic networks [31]. In fact, the  
332 number of these essential (and shared) genes used in this work (n=51) was lower than the  
333 proposed minimal set of genes in *E. coli* [32] consequently our set would be insufficient

334 to assure the bacterial viability. We do not suggest that the minimal genome in *E. coli*  
335 could be 51 genes, we only wanted to use the highest number of genes previously  
336 identified as minimal genome present in all *E. coli* genomes for subsequent ancestral  
337 reconstructions. However, this approach showed a solid phylogenetic reconstruction but  
338 did not yield sufficient resolution for itself to infer the ancestral processes of  
339 diversification into *E. coli* phylogroups. This could be explained by the loss of ancient  
340 phylogenetic information because all available sequences in databases correspond to  
341 organisms recently sampled (last 60-70 years, mostly along the last years), and therefore,  
342 represents the phylogroups orders of magnitude as later than the first steps of the species  
343 diversification (more than 20-30 million years) [33, 34]

344         However, LP approach is necessary for the next step, PF approach. They are sides  
345 of the same coin. The combination of LP and PF allowed us to infer the step-by-step  
346 diversification of *E. coli* species. Single nucleotide polymorphism data in PF is now being  
347 applied to understand differentiation processes at deep evolutionary timescales since the  
348 conserved positions still maintain phylogenetic information of their ancestors (Fig 3) [35].  
349 The results obtained using LP-PF strategy were reinforced with the analysis of the gained-  
350 lost genes in the different phylogroups with respect to hypothetical ancestral core genome  
351 (Fig 4). This evolutionary analysis strongly suggests that early steps in the diversification  
352 of *E. coli* phylogroups started with the diversification of two EB1A and FGB2 root  
353 lineages. On the other hand, the differentiation of phylogroup D only occurred much later,  
354 that is, strains from phylogroup D remained closely related with the putative common  
355 ancestor during a longer period of time, representing a different lineage. Indeed, the  
356 phylogroup D was always located in the most basal position among the known  
357 phylogroups [6, 14], conserving many traits from ancestral *E. coli* genome. Several  
358 groups had suggested a polyphyletic origin for phylogroup D [8, 13, 36]; however, one

359 of these branches was now clearly identified as phylogroup F and the differentiation of  
360 phylogroup F was prior to phylogroup D (Fig 3). Our results also support recent studies  
361 proposing FGB2 in a different evolutionary trajectory as the first diversified root lineage  
362 [37]. In fact, phylogroup B2, was the first differentiated phylogroup and consequently the  
363 most distant with respect to origin [2, 8, 10], losing more traits than other phylogroups  
364 from the ancestral genome. Analogous results were observed in the stepwise  
365 diversification in the EB1A lineage, where A and E were the first and last that underwent  
366 differentiation into this lineage. In other words, phylogroups B2 and A represent the more  
367 evolved branches, whereas F and E the less evolved within the two root phylogroups  
368 FGB2 and EB1A, respectively.

369 The staggered diversification processes suggested by LP-PF strategy was used as  
370 model for new evolutionary inferences. As genomic diversification likely parallels habitat  
371 specialization, and particularly the speciation of hosts, we tried to identify any possible  
372 signal showing differences in the evolutionary strategies between these lineages. The  
373 difference in the frequency of mutations suggests a higher evolvability for the FGB2  
374 lineage, and/or a higher ability than the EB1A lineage for the colonization of new  
375 ecological niches, and in general in transmission processes [38, 39]. On the other hand,  
376 the analysis of chromosomal sizes shows that B2 and A phylogroups (the most evolved  
377 in each respective root phylogroup) have the smallest genome sizes, whereas E and F  
378 phylogroups (the least evolved in each phylogroup) have the biggest ones (S2 Fig). These  
379 data could indicate that along the first evolutionary steps, the preservation or gain of DNA  
380 was higher than the loss, but the opposite occurred in later steps; the genetic loss was  
381 higher than the gain. This result would suggest reductive evolution processes, which had  
382 been previously proposed only for phylogroup A [1]. Moreover, when the gain and loss  
383 of specific genes was analyzed using the COG categories, the FGB2 lineage was



384 particularly enriched in genes involved in hosts and tissues colonization, virulence with  
385 respect to the EB1A lineage, which was more endowed (particularly the B1A sub-lineage)  
386 in functions assuring a more generalist style of life (see below). These results support the  
387 concept that EB1A and FGB2 lineages could be the result of the early adoption of  
388 different adaptive strategies.

389 We investigated the acquired or eliminated specific functions at the time of  
390 differentiation of the different phylogenetic branches. Within the EB1A root lineage,  
391 carbohydrate transports systems (*xylE*, *bgl* operon and *mng* operon) required for sugars  
392 uptake (xylose, aryl beta-glucosides, and mannose respectively) were more frequently  
393 found in B1A sub-lineage. On the contrary, the phylogroup E lost genes involved in the  
394 metabolism of sugars (xylulose and ribulose) and fatty acid metabolism. This might  
395 suggest a more generalist style of life (more different available sources of energy) in the  
396 B1A sublineage. However, the acquisition of these genes involved in the sugar uptake  
397 could induce a possible detrimental effect due to an excess of phosphorylated sugars [40]  
398 in the cell, so that the B1A sublineage acquired a sugar efflux transporter (*setA*) to  
399 regulate the phosphorylated sugars concentration into the cell. This result is consistent  
400 with previous findings between commensal and pathogenic *E. coli* strains [41]. Similar  
401 results were also observed in the ancestral reconstruction of other microorganisms, such  
402 as enterococci, suggesting that the carbohydrates utilization has been the major driver of  
403 bacterial specialization [42]. On the other hand, the phylogroup E has genes involved in  
404 the uptake of iron in the heme metabolism (*hmuV*, ECSMS35\_RS191855 to  
405 ECSMS35\_RS19215), which were missing in B1A sublineage. These genes could have  
406 contributed in the pathogenesis or in the specialization of niche and might represent an  
407 evolutionary convergence with FGB2 root lineage lifestyle (Fig 6).

408           Within the FGB2 root lineage, phylogroup B2, that has been suggested to be the  
409 most host-adapted including humans [43], seems to have lost some environmental-  
410 adaptive functions. These might include those involved in transport of melobiose and  
411 cyanate, or in the ability to grow in extreme conditions, such as acid pH or high  
412 temperature, or, environmentally-regulated adhesins as those encoded by *ycgV*, *ycb* or  
413 *sfm* (these last genes were lost by all members of the FGB2 lineage). On the contrary,  
414 EB1A root lineage acquired adhesins, as *yra*, which are only expressed as response to  
415 specific environmental changes [44].

416           Our analysis includes the greatest number of available whole genomes ever used  
417 to analyze the ancestral *E. coli* diversification events, offering a new and more  
418 comprehensive view on the evolutionary history of *E. coli*. Even though we used the LP-  
419 PF combined strategy to explore the ancient *E. coli* diversification events, it can be also  
420 implemented to cast light in recent diversifications, where the LP approach will probably  
421 gain more relevance. Of course, the combined strategy of LP and PF proposed in this  
422 work can be used as model for other detailed reconstructions of the evolutionary history  
423 of any other microorganism with a sufficient number of available sequenced genomes in  
424 databases. Future research on the staggered bacterial diversification will certainly provide  
425 more deep knowledge to understand the effect of environmental changes in microbial  
426 evolution.

427

## 428 **Materials and methods**

### 429 **Data sources and selection of genes used in the different evolutionary steps.**

430 The dataset used in this work included complete and draft genome sequences of 6,290  
431 *Escherichia* species downloaded from NCBI database  
432 ([ftp.ncbi.nlm.nih.gov/genomes/genbank/bacteria/Escherichia\\_coli/latest\\_assembly\\_versions](ftp.ncbi.nlm.nih.gov/genomes/genbank/bacteria/Escherichia_coli/latest_assembly_versions))  
433 as was available in August 2017. A detailed list of the genomes used is presented in  
434 S1 File. A Basic Local Alignment Search Tool (BLAST) of all-to-all genes found in the  
435 337 complete *E. coli* genomes was performed. Genes with  $\leq 70\%$  similarity in amino acid  
436 sequence and  $\geq 30\%$  difference in sequence length were identified. This approach yielded  
437 an estimated pan-genome of 25,508 genes. Then, BLAST of each one allowed us to  
438 determine the distribution of these genes in *Escherichia* genomes included in our  
439 database.

440 To guarantee the correct classification of all downloaded genomes, those genes present  
441 in 100% of 6,290 available *Escherichia* genomes were defined as *Escherichia* genus core  
442 genome (S1 Table). These genes were chosen and aligned using SeaView4.4 [45].  
443 Maximum likelihood phylogeny (ML) using GTR+ I+  $\Gamma$  as a model of nucleotide  
444 substitution was estimated and visualized with SeaView program. The aLRT  
445 (approximate Likelihood Ratio Test) considered only those branches with support values  
446  $> 99\%$ . Among the genes used in *Escherichia* genus core genome were searched the  
447 genes previously identified as minimal bacterial genome [17] (S2 Table). Once the  
448 operative *E. coli* database was established, the next steps were oriented to define the  
449 species core genome, that is, the ensemble of genes present in 100% of *E. coli* genomes  
450 (S2 File).

### 451 **Framework definition.**

452 The phylogenetic reconstructions using whole genomes were based on the analysis of  
453 core and flexible genes. The core genome was defined as the set of genes present in all  
454 members belonging to the same group (normally species). The flexible genome (or  
455 accessory genome) corresponded to the set of genes that were not present in all members  
456 of the same group. The combination of core and flexible genomes among all members of  
457 a same taxonomic unit was denominated pan-genome. However, we considered that the  
458 current allocation of genes provided insufficient information to trace evolutionary trends.  
459 Trying to overcome this limitation, we applied a combined strategy based on layered  
460 phylogenomics (LP) and polymorphism fingerprinting (PF) approaches. The LP approach  
461 was based on stratifying the genes in five successive genomic subdivisions,  
462 corresponding to the minimal (essential) genome, genus-core genome and species-core  
463 genome phylogroup-core genome and phylogroup-flexible genome. Each new  
464 subdivision should carry a different set of genes giving information about the different  
465 steps in the *E. coli* evolutionary, according to Fig 1. The set of genes assigned to the  
466 minimal genome could give us the most ancestral information, as they encoded essential  
467 function for the bacterial life and consequently, they were expected to evolve from the  
468 earliest, ancestral *E. coli* times. The genus-core genome included the genes present in all  
469 members of the genus *Escherichia*, but now excluded the genes of the minimal genome,  
470 to increase the differential features in the reconstruction of the phylogroups  
471 diversification process. In a third step, the *E. coli* specie-core included the genes present  
472 in all members of *E. coli* but now excluded the genes used in the previous steps to increase  
473 the differential features in the reconstruction of the phylogroups differentiation process.  
474 Finally, remaining genes present in a phylogroup and not included in any of the core  
475 genomes were classified as phylogroup-flexible genome. They would be candidates to  
476 describe the recent events and could help us to understand the adaptive possibilities of

477 each subpopulation into particular phylogroups and probably the future sub-specialization  
478 of subpopulations into *E. coli* phylogroups (*E. coli* expansion). The PF approach was  
479 based on the SNPs for the reconstruction at deep evolutionary timescales [35]. First, the  
480 conserved positions in all genomes of each phylogroup were known and only those with  
481 variable positions with respect to their hypothetical ancestor were selected. The number  
482 of selected SNPs was overprinted on the different branches in *E. coli* phylogeny  
483 previously established. The combined strategy could allow us to infer the evolutionary  
484 scenario of diversification in *E. coli*.

#### 485 **Current and ancestral phylogeny reconstruction.**

486 To alleviate the burden of computer-time required to reconstruct large phylogenies,  
487 phylogenies of concatenated genes with cryptic clade I as outgroup (reference sequence  
488 TW10509) were reconstructed by ML with RAxML (Randomized Axelerated Maximum  
489 Likelihood) [46] using GTR + I +  $\Gamma$  as a model of nucleotide substitution. SH test using  
490 FastTree with values > 99% was considered valid support [47]. To classify all genomes  
491 in their corresponding phylogroups, the following reference sequences were used for the  
492 identification of the branches, NC\_000913 as phylogroup A, NC\_013361 as phylogroup  
493 B1, NC\_009801 as phylogroup C, NC\_002655 as phylogroup E, NC\_017644 as  
494 phylogroup B2, NC\_010498 as phylogroup F and CU928163 as phylogroup D. New  
495 monophyletic groups with more than 10 sequences were considered as new phylogroups.  
496 The orphan sequences (lower than n=10 sequences) were excluded in successive analyses.  
497 We considered as a necessary requirement to define a new phylogroup that the estimated  
498 evolutionary distance between the hypothetical new group and known phylogroups must  
499 be higher than the distance among previously established phylogroups. Evolutionary  
500 distance between two phylogroups was obtained considering the relative length of the  
501 branches. The mean intragroup evolutionary distance was estimated as the mean distance

502 of each branch to the origin of the phylogroup, the subtree of each phylogroup was  
503 obtained from the tree and the distances were extracted with the TreeStat program  
504 included in the BEAST software ([tree.bio.ed.ac.uk/software/beast/](http://tree.bio.ed.ac.uk/software/beast/)).

505 In order to infer the staggered diversification processes in *E. coli*, the previously described  
506 combined strategy was implemented. The phylogenetic trees in the different layers in the  
507 LP approach (minimal genome, genus-core genome and species-core genome and  
508 phylogroup-core genome) were performed using ML with RAxML using GTR + I +  $\Gamma$  as  
509 a model of nucleotide substitution. The SH test using FastTree with values > 99% was  
510 considered valid support. According to the PF approach, the invariant positions (100%  
511 consensus sequence) present in all genomes of the same phylogroups were identified  
512 using SeaView4. Among the conserved positions, polymorphic sites were selected using  
513 DnaSP software [48] These positions were used to reconstruct the evolutionary history  
514 using the parsimony method available in Mesquite program ([www.mesquiteproject.org](http://www.mesquiteproject.org)).

515 On the other hand, a second strategy based on the reconstruction of hypothetical *E. coli*  
516 ancestral core genome was implemented to reinforce the results obtained with combined  
517 LP-PF strategy. This ancestral genome was estimated by applying the MGRA program  
518 (Multiple Genome Rearrangements and Ancestors), a tool for reconstruction of ancestral  
519 gene orders and the history of genome rearrangements ([mgra.cblab.org](http://mgra.cblab.org)), using  
520 phylogroup-core genome and cryptic clade I as outgroup.

#### 521 **Chromosomal size for all *E. coli* phylogroups.**

522 When all genomes were allocated in phylogroups, the mean chromosomal size was  
523 calculated with confidence level 95% using SPSS program. The statistical comparison  
524 among all phylogroups was estimated using Kruskal-Wallis nonparametric tests for

525 comparing K-independent samples or the Mann-Whitney nonparametric two-sample  
526 tests.

527 **Inferring the accumulated mutation and recombination in each phylogroup along**  
528 **the time.**

529 The evolutionary distances represent the accumulated mutations per site. These data  
530 provide the mean and 95% of confidence interval of the evolutionary distances of the  
531 different ancestral branches. Those branches with values of accumulated mutations higher  
532 or lower than mean value can then be distinguished. The recombination was suspected  
533 when the topology of each gene belonging to the *E. coli*-core genome (ML using GTR +  
534 I +  $\Gamma$  as a model of nucleotide substitution) showed inconsistency with the topology of  
535 the *E. coli* species-core genome tree. A limitation of this approach is the lack of support  
536 for individual genes, because sometimes the phylogenetic noise is high. To avoid this  
537 limitation, the consensus phylogroup sequence for each gene (set consensus the default  
538 threshold) was defined for phylogroups. This approach reduced the noise but also  
539 excluded the non-ancestral recombination. In other words, only the ancestral  
540 recombination could be inferred. Finally, the inconsistencies were analyzed with the tree-  
541 puzzle 5.2 program [49] and SH test ( $p < 0.05$ ).

542 **Gain and lost genes between the main lineages and among different phylogroups**  
543 **into same lineages.**

544 This approach could identify those genes segregated during early stages of  
545 diversification/specialization. For the identification of ancestral segregation, we used a  
546 threshold of 95%-5% with respect to ancestor nodes for assigning a gene as present or  
547 absent respectively. The presence/absence of genes was inferred by parsimony method  
548 using the *E. coli* core genome phylogeny at each ancestral node, quantifying the incoming  
549 and outgoing genes between consecutive nodes of the tree. If a determined gene was lost

550 (or gained) in two phylogroups sharing a common ancestor, only a single event (loss or  
551 gain) was considered. If they did not share a common ancestor, then we considered that  
552 two independent events had occurred. Therefore, we could then calculate how many  
553 genes and how many times the studied genes in each branch and in the *E. coli* tree were  
554 lost respectively.

555 Once the gain/lost genes were identified, they were classified based on their presumptive  
556 functions. The conserved domains in each gene were analyzed using CD-search tool,  
557 which allowed allocation of the genes in functional COG categories  
558 ([www.ncbi.nlm.nih.gov/COG](http://www.ncbi.nlm.nih.gov/COG)). We condensed these COG-categories in four  
559 supercategories: Group A: Cell interactions, including genes presumptively involved in  
560 host-bacterial interactions, including the functional COG codes M, N, U, V and W  
561 corresponding to cell wall, membrane and envelope biogenesis (M); cell motility (N);  
562 intracellular trafficking, secretion, transport (U); defense mechanism (V); extracellular  
563 structures (W). Group B: Replication, including COG codes D, J, K, L, O and T,  
564 corresponding to cell division and chromosome partitioning (D), replication, ribosomal  
565 and biogenesis (J), transcription (K), replication, recombination and repair (L), post-  
566 translational modification, protein turnover, chaperones (O), signal transduction mechanism  
567 (T). Group C: Metabolism, including C, E, F, G, H, I, P and Q, corresponding to energy  
568 production and conversion (C), aminoacid transport and metabolism (E), nucleotide  
569 transport and metabolism (F), carbohydrate transport and metabolism (G), coenzyme  
570 transport and metabolism (H), lipid transport and metabolism (I) inorganic ion transport  
571 and metabolism (P), secondary metabolites, transport and metabolism (Q). Group D:  
572 Other functions including S (unknown), R (general function) and X (mobilome,  
573 prophages and transposons). Consistent with the aim of discovering unique properties  
574 involved in the evolutionary processes of each lineage or node of diversification, the



575 functional characteristics of genes specifically present or absent in the phylogenetic  
576 groups were examined (S3 File).

577

578

579    **REFERENCES**

- 580        1. Sims GE, Kim SH. (2011) Whole-genome phylogeny of *Escherichia coli/Shigella*  
581            group by feature frequency profiles (FFPs). *Proc Natl Acad Sci USA*. **108**:8329-  
582            8334
- 583        2. , Rasko DA, Webster DR, Sahl JW, Bashir A, Boisen N, Scheutz F, et al (2011).  
584            Origins of the *E. coli* strain causing an outbreak of hemolytic-uremic syndrome  
585            in Germany. *N Engl J Med*. **365**:709-717
- 586        3. Herzer PJ, Inouye S, Inouye M, Whittam TS. (1990) Phylogenetic distribution of  
587            branched RNA-linked multicopy single-stranded DNA among natural isolates of  
588            *Escherichia coli*. *J Bacteriol*. **172**:6175-6181
- 589        4. Tenaillon O, Skurnik D, Picard, B, Denamur E. (2010) The population genetics  
590            of commensal *Escherichia coli*. *Nat. Rev. Microbiol*. **8**: 207–217
- 591        5. Blattner FR, Plunkett G 3rd, Bloch CA, Perna NT, Burland V, Riley M, et al  
592            (1997). The complete genome sequence of *Escherichia coli* K-12. *Science*.  
593            **277**:1453-1462
- 594        6. Chaudhuri RR, Henderson IR. (2012) The evolution of the *Escherichia coli*  
595            phylogeny. *Infect Genet Evol*. **12**:214-226
- 596        7. Lan R, Reeves PR. (2000). Intraspecies variation in bacterial genomes: the need  
597            for a species genome concept. *Trends Microbiol* **9**, 396–401)
- 598        8. Touchon M, Hoede C, Tenaillon O, Barbe V, Baeriswyl S, Bidet P , et al. (2009)  
599            Organized genome dynamics in the *Escherichia coli* species results in highly  
600            diverse adaptive paths. *PLoS Genet*. **5**:e1000344
- 601        9. Lukjancenko O, Wassenaar TM, Ussery DW. (2010) Comparison of 61 sequenced  
602            *Escherichia coli* genomes. *Microb Ecol*. **60**:708-720

- 603 10. Kaas RS, Friis C, Ussery DW, Aarestrup FM. (2012) Estimating variation within  
604 the genes and inferring the phylogeny of 186 sequenced diverse *Escherichia coli*  
605 genomes. *BMC Genomics*. **13**:577
- 606 11. Meier-Kolthoff JP, Hahnke RL, Petersen J, Scheuner C, Michael V, Fiebig A , et  
607 al. (2014) Complete genome sequence of DSM 30083(T), the type strain  
608 (U5/41(T)) of *Escherichia coli*, and a proposal for delineating subspecies in  
609 microbial taxonomy. *Stand Genomic Sci*. **9**:2
- 610 12. Hazen TH, Sahl JW, Fraser CM, Donnenberg MS, Scheutz F, Rasko DA. (2013)  
611 Refining the pathovar paradigm via phylogenomics of the attaching and effacing  
612 *Escherichia coli*. *Proc Natl Acad Sci USA*. **110**:12810-12815
- 613 13. Leopold SR, Sawyer SA, Whittam TS, Tarr PI. (2011) Obscured phylogeny and  
614 possible recombinational dormancy in *Escherichia coli*. *BMC Evol Biol*. **11**:183
- 615 14. Bromberg R, Grishin NV, Otwinowski Z. (2016) Phylogeny Reconstruction with  
616 Alignment-Free Method That Corrects for Horizontal Gene Transfer. *PLoS*  
617 *Comput Biol*. **12**:e1004985
- 618 15. Jauregui F, Landraud L, Passet V, Diancourt L, Frapy E, Guigon G, et al. (2008)  
619 Phylogenetic and genomic diversity of human bacteremic *Escherichia coli* strains.  
620 *BMC Genomics*. **9**:560
- 621 16. Turrientes MC, González-Alba JM, del Campo R, Baquero MR, Cantón R,  
622 Baquero F, et al. (2014) Recombination blurs phylogenetic groups routine  
623 assignment in *Escherichia coli*: setting the record straight. *PLoS One*. **9**:e105395
- 624 17. Gil R, Silva FJ, Peretó J, Moya A. (2004) Determination of the core of a minimal bacterial  
625 gene set. *Microbiology and Molecular Biology Reviews*. **68**:518-537
- 626 18. Dilucca M, Cimini G, Giansanti A. (2018) Essentiality, conservation, evolutionary  
627 pressure and codon bias in bacterial genomes. *Gene*. 2018; **663**:178-188

- 628 19. Avdeyev P, Jiang S, Aganezov S, Hu F, Alekseyev MA. (2016) Reconstruction of  
629 Ancestral Genomes in Presence of Gene Gain and Loss. *J Comput Biol.* **23**:150-164
- 630 20. Hedge J, Wilson DJ. (2014) Bacterial phylogenetic reconstruction from whole  
631 genomes is robust to recombination but demographic inference is not. *MBio.*  
632 **5**:e02158
- 633 21. Sampaio MM, Chevance F, Dippel R, Eppler T, Schlegel A, Boos W, et al. (2004)  
634 Phosphotransferase-mediated transport of the osmolyte 2-O-alpha-mannosyl-D-  
635 glycerate in *Escherichia coli* occurs by the product of the *mngA* (*hrsA*) gene and  
636 is regulated by the *mngR* (*farR*) gene product acting as repressor. *J Biol Chem.*  
637 **279**:5537-5548
- 638 22. Richards GR, Patel MV, Lloyd CR, Vanderpool CK. (2013) Depletion of  
639 glycolytic intermediates plays a key role in glucose-phosphate stress in  
640 *Escherichia coli*. *J Bacteriol.* **195**:4816-4825
- 641 23. Liu JY, Miller PF, Willard J, Olson ER. (1999) Functional and biochemical  
642 characterization of *Escherichia coli* sugar efflux transporters. *J Biol Chem.*  
643 **274**:22977-22984
- 644 24. Neumann M, Mittelstädt G, Iobbi-Nivol C, Saggu M, Lenzian F, Hildebrandt P,  
645 et al. (2009) A periplasmic aldehyde oxidoreductase represents the first  
646 molybdopterin cytosine dinucleotide cofactor containing molybdo-flavoenzyme  
647 from *Escherichia coli*. *FEBS J.* **276**:2762-2774
- 648 25. Anderson MA, Mann MD, Evans MA, Sparks-Thissen RL. (2017) The inner  
649 membrane protein YhiM is necessary for *Escherichia coli* growth at high  
650 temperatures and low osmolarity. *Arch Microbiol.* **199**:171-175
- 651 26. Correia FF, D'Onofrio A, Rejtar T, Li L, Karger BL, Makarova K, Koonin EV, et  
652 al. Kinase activity of overexpressed HipA is required for growth arrest and  
653 multidrug tolerance in *Escherichia coli*. *J Bacteriol.* 2006 Dec;**188**(24):8360-7

- 654 27. Van Melderen L. (2010) Toxin-antitoxin systems: why so many, what for? *Curr*  
655 *Opin Microbiol.* **13**:781-785
- 656 28. Land M, Hauser L, Jun SR, Nookaew I, Leuze MR, Ahn TH, et al. (2015) Insights  
657 from 20 years of bacterial genome sequencing. *Funct Integr Genomics.* **15**:141-  
658 61
- 659 29. Cook H, Ussery DW. (2013) Sigma factors in a thousand *E. coli* genomes. *Environ*  
660 *Microbiol.* **15**:3121-3129
- 661 30. Mau B, Glasner JD, Darling AE, Perna NT. (2006). Genome-wide detection and  
662 analysis of homologous recombination among sequenced strains of *Escherichia*  
663 *coli*. *Genome Biol.* **7**:R44
- 664 31. Ye YN, Ma BG, Dong C, Zhang H, Chen LL, Guo FB. (2016) A novel proposal  
665 of a simplified bacterial gene set and the neo-construction of a general minimized  
666 metabolic network. *Sci Rep.* **6**:35082
- 667 32. Kato, J. and Hashimoto, M. (2007) Construction of consecutive deletions of the  
668 *Escherichia coli* chromosome. *Mol. Syst. Biol.* **3**:132
- 669 33. Battistuzzi FU, Feijao A, Hedges SB, (2004). A genomic timescale of prokaryote  
670 evolution: insights into the origin of methanogenesis, phototrophy, and the  
671 colonization of land. *BMC Evolutionary Biology.* **4**: 44. doi:10.1186/1471-2148-  
672 4-44. PMC 533871 . PMID 15535883
- 673 34. Lecointre G, Rachdi L, Darlu P, Denamur E, (1998). *Escherichia coli* molecular  
674 phylogeny using the incongruence length difference test. *Molecular Biology and*  
675 *Evolution.* **15** (12): 1685–95. doi:10.1093/oxfordjournals.molbev.a025895.  
676 PMID 9866203)
- 677 35. Leaché AD and JR Oaks. (2017) The Utility of Single Nucleotide Polymorphism  
678 (SNP) Data in Phylogenetics *Annu Rev Ecol Evol Syst* **48**: 69-84

- 679 36. Skippington E, Ragan MA. (2012) Phylogeny rather than ecology or lifestyle  
680 biases the construction of *Escherichia coli-Shigella* genetic exchange  
681 communities. *Open Biol.* **2**:120112
- 682 37. Tourret J, Denamur E. (2016) Population Phylogenomics of Extraintestinal  
683 Pathogenic *Escherichia coli*. *Microbiol Spectr.* **4**
- 684 38. Loh E, Salk JJ, Loeb LA. (2010) Optimization of DNA polymerase mutation rates  
685 during bacterial evolution. *Proc Natl Acad Sci USA.* **107**:1154-1159
- 686 39. Baquero F. 2018. Causality in Biological Transmission: Forces and Energies,  
687 *Microbiol Spectrum* **6**(3): MTBP-0018-2016. doi:10.1128/microbiolspec.MTBP-  
688 0018-2016
- 689 40. Deutscher J, Francke C, Postma PW. (2006) How phosphotransferase system-  
690 related protein phosphorylation regulates carbohydrate metabolism in bacteria.  
691 *Microbiol Mol Biol Rev.* **70**:939-1031
- 692 41. Luo C, Walk ST, Gordon DM, Feldgarden M, Tiedje JM, Konstantinidis KT.  
693 (2011). Genome sequencing of environmental *Escherichia coli* expands  
694 understanding of the ecology and speciation of the model bacterial species. *Proc*  
695 *Natl Acad Sci USA* **108**: 7200–7205
- 696 42. Lebreton F, Manson AL, Saavedra JT, Straub TJ, Earl AM, Gilmore MS . (2017)  
697 Tracing the Enterococci from Paleozoic Origins to the Hospital. *Cell.* **169**:849-  
698 861
- 699 43. Gordon, DM. *Escherichia coli*, the organism. In *Escherichia coli* Pathotypes and  
700 Principles of Pathogenesis, 2<sup>nd</sup> edition. Ed. By D Donnenberg, MS. Elsevier. 2013
- 701 44. Korea CG, Badouraly R, Prevost MC, Ghigo JM, Beloin C. (2010) *Escherichia*  
702 *coli* K-12 possesses multiple cryptic but functional chaperone-usher fimbriae with  
703 distinct surface specificities. *Environ Microbiol.* **12**:1957-1977

- 704 45. Gouy M, Guindon S and Gascuel O. (2010) SeaView version4: A multiplatform  
705 graphical user interface for sequence alignments and phylogenetic tree building.  
706 *Mol Biol Evol* **27**:221-224
- 707 46. Stamatakis A. (2014) "RAxML Version 8: A tool for Phylogenetic Analysis and  
708 Post-Analysis of Large Phylogenies". In *Bioinformatics*. **30**:1312-3
- 709 47. Price MN, Dehal PS, and Arkin AP. (2010) FastTree 2 Approximately Maximum-  
710 Likelihood Trees for Large Alignments. *PLoS ONE*, **5**:e9490
- 711 48. Librado P. and Rozas J.(2009) DnaSP v5 : A software for comprehensive  
712 analysis of DNA polymorphism data. *Bioinformatics* 25:1451-1452
- 713 49. Schmidt HA, Strimmer K, Vingron M von Haeseler A. (2002) TREE-PUZZLE:  
714 maximum likelihood phylogenetic analysis using quartets and parallel computing.  
715 *Bioinformatics*. **18**:502-504
- 716

717 **Fig 1. Proposal of framework for the evolutionary reconstruction of *E. coli*.** The  
718 bacterial DNA classically allocated in core or flexible genomes (thick vertical lines) were  
719 subdivided in order to obtain an evolutionary gradient from the most ancestral genes (core  
720 genome) to the recently acquired (flexible genome). Different layers of analysis,  
721 reflecting the taxonomic units genetically established (bacteria, genus, species,  
722 phylogroup) and remaining genes were considered. The most ancestral set of genes  
723 corresponds to those genes identified as minimal genome (red), representing genes  
724 present in all bacteria and probably they are essential genes. *Escherichia* genus-core  
725 genome (orange) corresponds to the genes implicated in the *Escherichia* diversification  
726 prior to the formation of *E. coli* species. *E. coli* species-core genome (yellow), represents  
727 the period between the emergence of the species until the start of *E. coli* specialization.  
728 Phylogroup-core genome (light blue) represents the specialization and phylogroup-  
729 flexible genome including the remaining genes (dark blue), to reach the current limit *E.*  
730 *coli* expansion.

731

732 **Fig 2. *Escherichia coli* species phylogenetic reconstruction and evolutionary**  
733 **divergence among the phylogroups. A) *E. coli* species core phylogeny.** Phylogenetic  
734 reconstruction using Maximum-likelihood (GTR+I+ $\Gamma$ , SH  $\geq$ 99%) with the concatenate  
735 of 1,027 genes (1,046,053 nt) present in the 100% of sequenced *E. coli* strains. All  
736 concatenate with less than 95% site coverage were eliminated. The established  
737 phylogroup C could not be distinguished in phylogroup B1. Cryptic clade I was included  
738 as outgroup in the reconstruction. **B) Estimates of average evolutionary divergence**  
739 **over all sequence pairs between groups.** The number of base substitutions per site from  
740 averaging all sequence pairs between groups pairs using the GTR+I+  $\Gamma$  model are shown.  
741 The evolutionary distance, indicated as circles with different colors and a character,



742 correspond to the distance between the phylogroup in X-axis and the phylogroups  
743 indicated for the character next to the circle. The grey circles show the distance of the  
744 new identified phylogroup G. The white circles correspond to the evolutionary divergence  
745 of phylogroup D. The circles with two colors correspond to the comparison between the  
746 other phylogroups using the same colors as Fig 2A

747

748 **Fig 3. Proposed evolutionary scenario in the diversification of *E. coli* based on results**  
749 **obtained with LP-PF strategy.** The branches reflect the accumulated mutations, but  
750 their lengths are not proportional to the observed distance.

751

752 **Fig 4. Representation of the presence of ancestral genes in each phylogroup.** The  
753 percentages of strains carrying 95-99% of genes identified as ancient genome are  
754 represented using the MGRA program (<http://mgra.cblab.org>). In the right column the  
755 percentage of genes from hypothetical ancient genome conserved in each phylogroup is  
756 presented. The positions of the phylogroups along these horizontal lines correspond to  
757 the percentage of sequences carrying the ancestral genes. The cryptic clade I was used as  
758 outgroup in order to confirm the intermediate evolutionary position of EPEC-503225 and  
759 KTE146 strains (see main text)

760

761 **Fig 5. Patterns of distribution by functional categories of gained/lost gene based on**  
762 **Cluster Orthologous Genes (COG) classification.** Four main categories were analyzed:  
763 Cell interactions, including the functional categories M (cell wall/membrane/ envelope  
764 biogenesis), N (cell motility), U (intracellular trafficking/ secretion/ transport), V  
765 (defense mechanism) and W (extracellular structure). Replication, including D (cell

766 division), J (replication, ribosomal and biogenesis), K (transcription), L (replication,  
767 recombination and repair), O (post-translational modification, chaperones), T (signal  
768 transduction). Metabolism, including C (energy production), E (amino acid transport), F  
769 (nucleotide transport), G (coenzyme transport); I (lipid transport), P (inorganic ion  
770 transport), Q (secondary metabolites). Other functions, including S (unknown), R  
771 (general functions) and X (mobilome, prophage). Phylogroup D was used as reference  
772 genome because the number of available sequences in the previously used outgroups was  
773 very low.

774

775 **Fig 6. Signatures of phylogroup-core genome in the ancestral evolution of *E. coli***  
776 **phylogroups.** The gained/lost genes are indicated with orange and blue arrows, using the  
777 phylogeny described in this work. Genes in bold are those gained or lost in different  
778 branches indicating possible events in ecological adaptation. This representation could  
779 help to understand the different events of ecological adaptation. The genes are presented  
780 by their locus\_tag identifier or with the available name in PubMed. ECSMS35  
781 corresponds to the sequence NC\_010498, ECO26 corresponds to the sequence  
782 NC\_013361. Phylogroup D was used as reference genome, because the number of  
783 available sequences of the *E. coli* recent ancestor was very low.

784

## 785 **Supporting information Legends**

786 **S1 Fig. *Escherichia* genus phylogenetic reconstruction. A) ML tree of *Escherichia***  
787 **genus-core genome.** Phylogenetic reconstruction using Maximum-Likelihood (GTR+ I+  
788  $\Gamma$ , aLR  $\geq 99\%$ ) with the concatenate of 189 genes (244,170 nt) corresponding to 100% of  
789 sequenced *Escherichia* strains, available in Genbank (last access August-17'). All  
790 concatenate with less than 95% site coverage were eliminated. No sequence belonging to  
791 cryptic clade IV was used because there is not a complete available sequence in public  
792 database. *A. hermanni* and *E. vulneris* were also included but they were used as outgroup.  
793 **B) Distribution of those 40 misclassified *E. coli*.** Identification of those sequences  
794 misclassified as *E. coli* with their access numbers  
795 (<https://www.ncbi.nlm.nih.gov/nucleotide/>) and their correct allocation based on the  
796 previous phylogenetic reconstruction. The access numbers NZ\_JNPC01000001 and  
797 NZ\_JNPD01000001 have been recently re-classified as *Raoultella*.

798

799 **S2 Fig. Chromosomal size for all *E. coli* phylogroups.** The mean chromosomal size  
800 was calculated in all phylogroups with confidence range  $\geq 95\%$ . Significant differences in  
801 mean chromosomal sizes among phylogroups were observed (Kruskal-Wallis  $p < 0.0001$ )  
802 and the pairwise comparisons were also significant (Mann-Whitney  $p < 0.02$ ) except for D  
803 and G phylogroups.

804

805 **S3 Fig. A) Distribution of *E. coli* genes used in the different evolutionary steps.** *E.*  
806 *coli* genome was differentiated in core and accessory genome. The number of genes used  
807 in the different layers are shown. The layers related to the most ancestral events (core  
808 genome) are shown in dark colors, whereas the recent events (accessory genome) are

809 shown in high colors. The exception is the light blue oval corresponding to phylogroup-  
810 core genome as it is a core genome for phylogroups but is not *E. coli* core genome *sensu*  
811 *strict*. The estimation of *E. coli* pan-genome was inferred using the 337 available  
812 complete sequences. **B) Circular maps of core genome of different phylogroups.** The  
813 inner ring corresponds to *E. coli* K2 used as reference strain. The successive rings  
814 correspond to the core genome for phylogroup A, phylogroup B1, phylogroup E,  
815 phylogroup D, phylogroup F, phylogroup G and phylogroup B2 in the most external ring.  
816

817 **S4 Fig. Ancestor phylogenetic reconstruction and the origin of *E. coli* phylogroups.**

818 **A) Layered phylogenomics (LP) approach**, using maximum-likelihood (GTR+I+ $\Gamma$ , SH  
819  $\geq 99\%$ ). All concatenate with less than 95% site coverage were eliminated. To avoid  
820 inferences, the genes used in the minimal genome tree were not used in *Escherichia*  
821 genus-core genome (hence although the number of genes defined as genus core genome  
822 was 189, only 138 genes were used). In a similar way, the species-core genome was  
823 performed with 838 genes, after eliminating the 189 genes corresponding to minimal and  
824 genus-core genome. The MRCA corresponds to the sequences EPEC-503225 and  
825 KTE146 identified in figure 2. A similar evolutionary reconstruction was obtained when  
826 cryptic clade I was used as outgroup, although the great evolutionary distance from *E.*  
827 *coli* to the cryptic clade I was confirmed by the analyzed mutations (range 76-5,545  
828 mutations). **B) Phylogroup polymorphism fingerprinting (PF).** Among the variable  
829 positions, only those changes present in all members of a phylogroup or lineage were  
830 analyzed. Based on the reference phylogeny Mesquite program allowed overprinting the  
831 evolutionary moment when these changes were selected. The numbers described in the  
832 parenthesis show the total number of conserved positions among all phylogroups

833

834 **S5 Fig. Inferred frequencies of accumulated mutations per site in the *E. coli***  
835 **branches.** The phylogenetic reconstructions of minimal genome, genus-core genome and  
836 species-core genome were performed using ML with RAxML using GTR + I +  $\Gamma$  as a  
837 model of nucleotide substitution (excluding the ancestral recombinant genes). The  
838 suspected recombinant genes excluded were 5, 6 and 18 among the set of genes used in  
839 minimal genome, genus-core genome and species-core genome respectively. SH test  
840 using FastTree with values  $> 99\%$  was considered valid support. The evolutionary  
841 distances represent the accumulated mutations per site. These data allow obtainment of  
842 the mean and 95% of confidence interval. The asterisks show the branches out of the  
843 confidence range. Brown and blue branches are the branches with accumulated mutations  
844 per site higher and lower than normal value respectively.

845

846 **S6 Fig. Ancestral recombination detected between the different *E. coli* phylogroups.**  
847 The recombination was suspected when the topology of the *E. coli* core genome tree  
848 showed inconsistency with the topology of the single gene tree using the consensus  
849 phylogroup sequences (set consensus default threshold). Arrows show the defection from  
850 donor to receptor.

851

852

853 **S1 Table. Genes defined as *Escherichia* genus core genome.** Genes present in 100% of  
854 6,290 *Escherichia* genomes available in our database. The genes are identified by their  
855 name

856 **S2 Table. Genes identified as minimal bacterial genome.** Genes present in 100% of  
857 6,290 *Escherichia* genomes available in our database and that previously has been  
858 estimated as minimal bacterial genome. The genes are identified by their name

859

860 **S1 File. Complete and draft genome sequences used in this work.** Sequences  
861 downloaded from database  
862 ([ftp.ncbi.nlm.nih.gov/genomes/genbank/bacteria/Escherichia\\_coli/latest\\_assembly\\_versions](ftp.ncbi.nlm.nih.gov/genomes/genbank/bacteria/Escherichia_coli/latest_assembly_versions)  
863 [ions](ftp.ncbi.nlm.nih.gov/genomes/genbank/bacteria/Escherichia_coli/latest_assembly_versions)). Definition includes the access number, organism and if it is a complete genome or  
864 draft

865 **S2 File. Genes defined as *Escherichia coli* species core genome.** Genes present in 100%  
866 of *E. coli* genomes available in our database. The genes are identified by their name or  
867 locus\_tag identifier. ECNA114 corresponds to the sequence NC\_017644, ECSMS35  
868 corresponds to the sequence NC\_010498, ECUMN corresponds to the sequence  
869 CU928163 and Z corresponds to the sequence NC\_002655

870

871 **S3 File. Genes segregated during early stages of evolution of *Escherichia coli***  
872 **phylogroups.** The presence/absence of genes were inferred by parsimony method using  
873 the *E. coli* core genome phylogeny and a stringent threshold of 95%-5% respect to  
874 ancestor nodes for assigning a gene as present or absent respectively. It includes the  
875 definition of the different COG functional categories and the reference sequences where  
876 to find the genes identified by their locus\_tag.

877

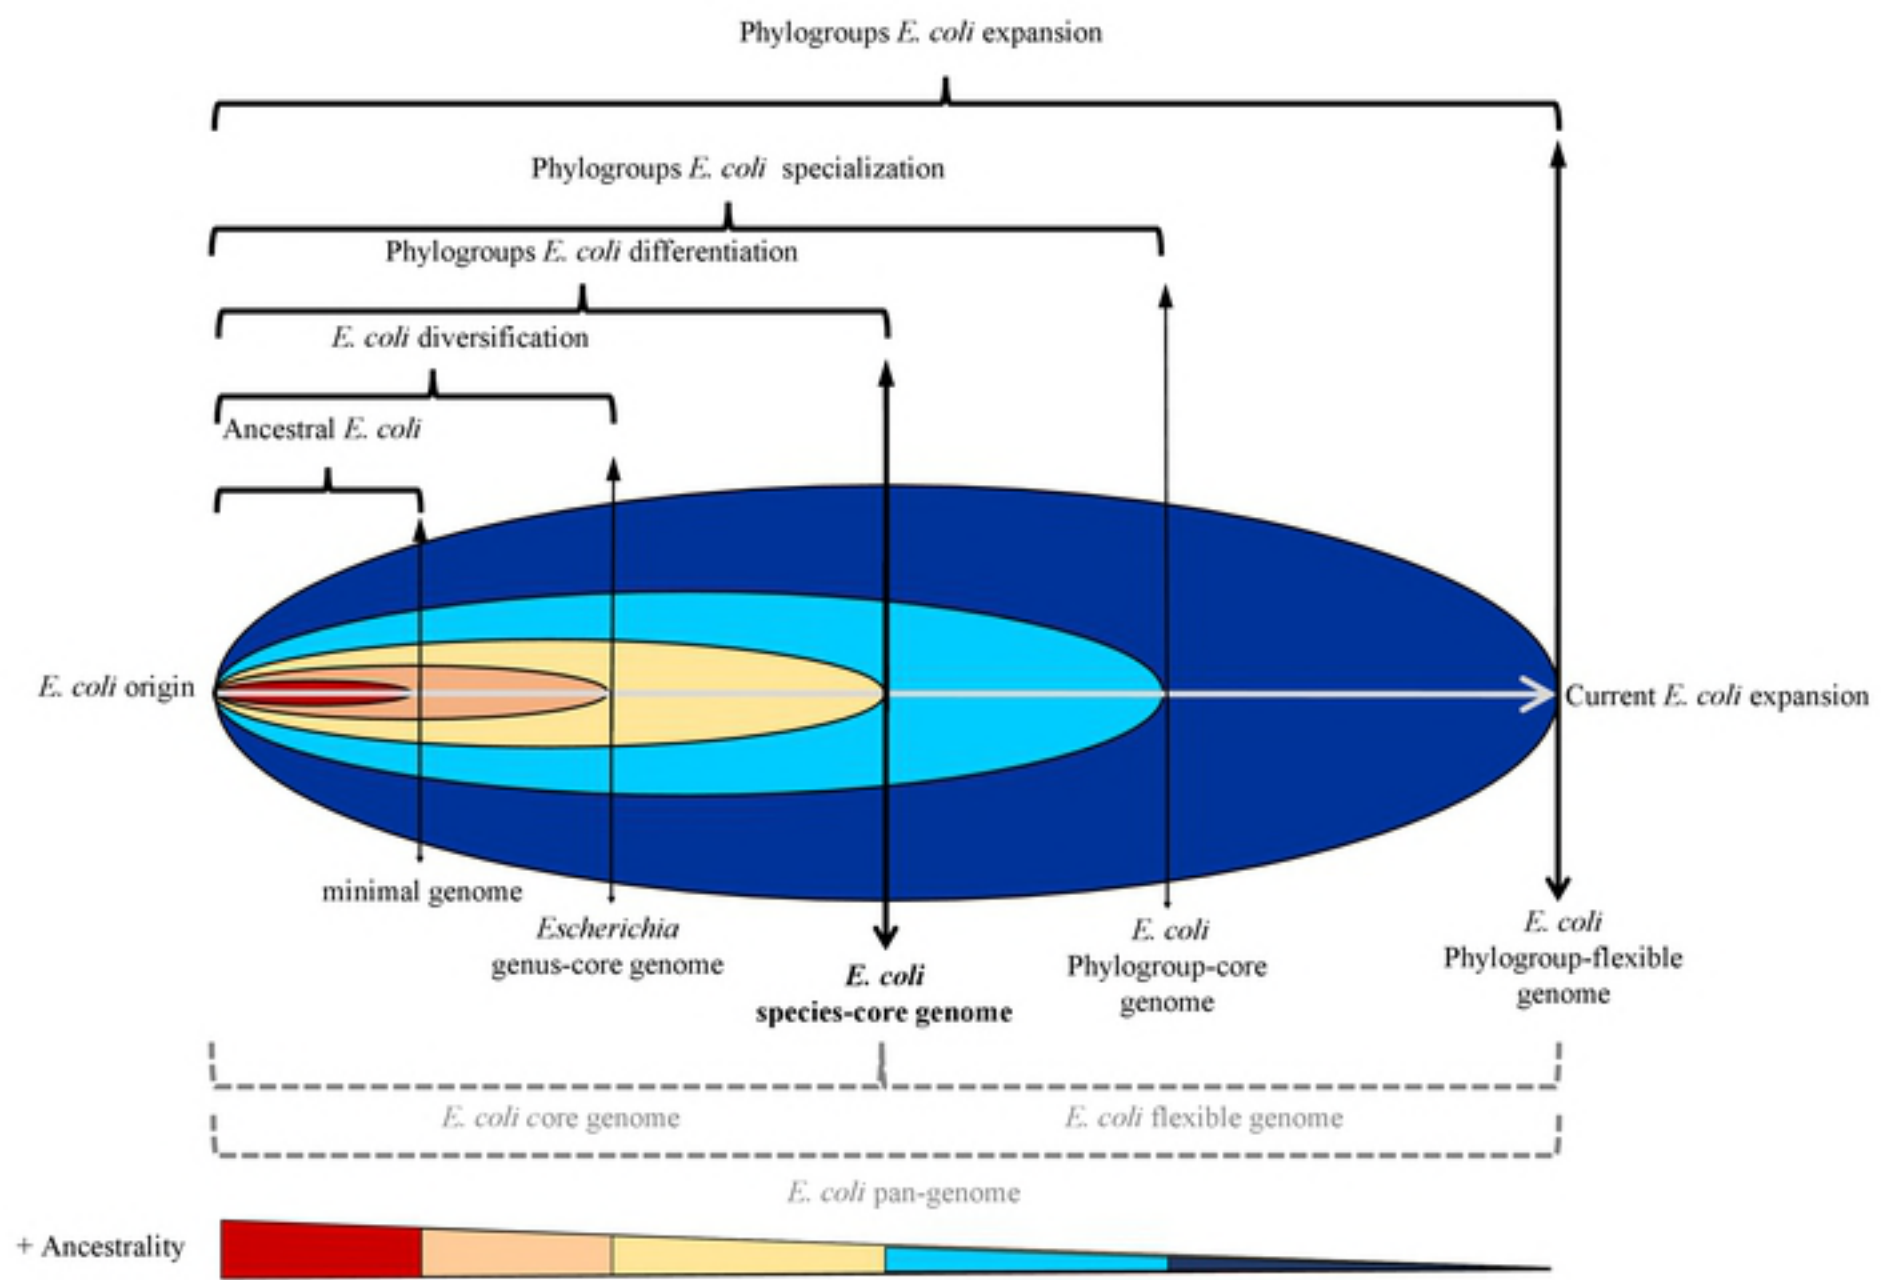

Figure 1



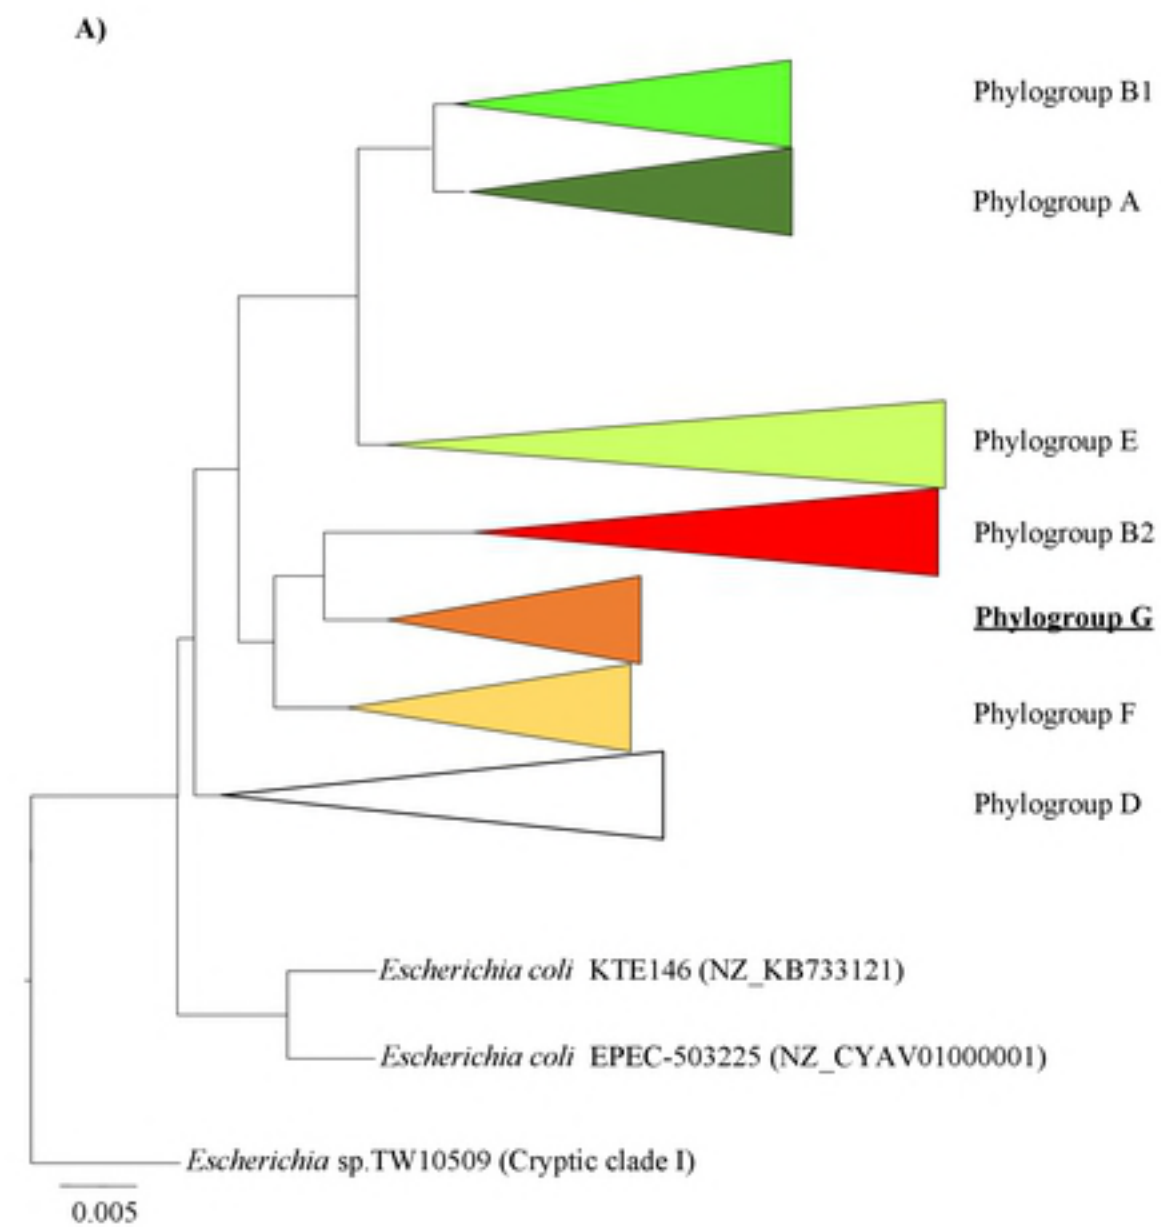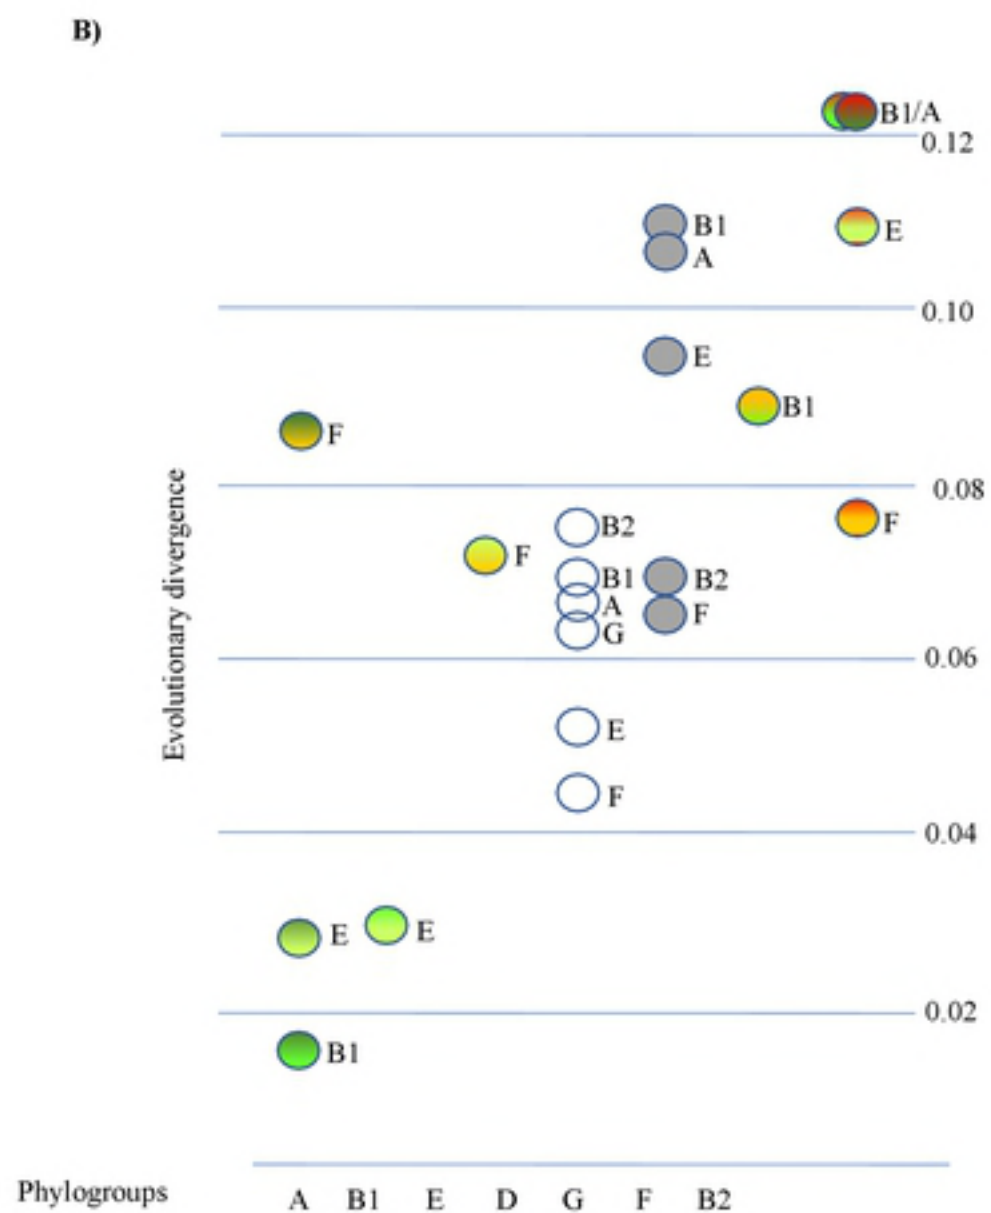

Figure 2

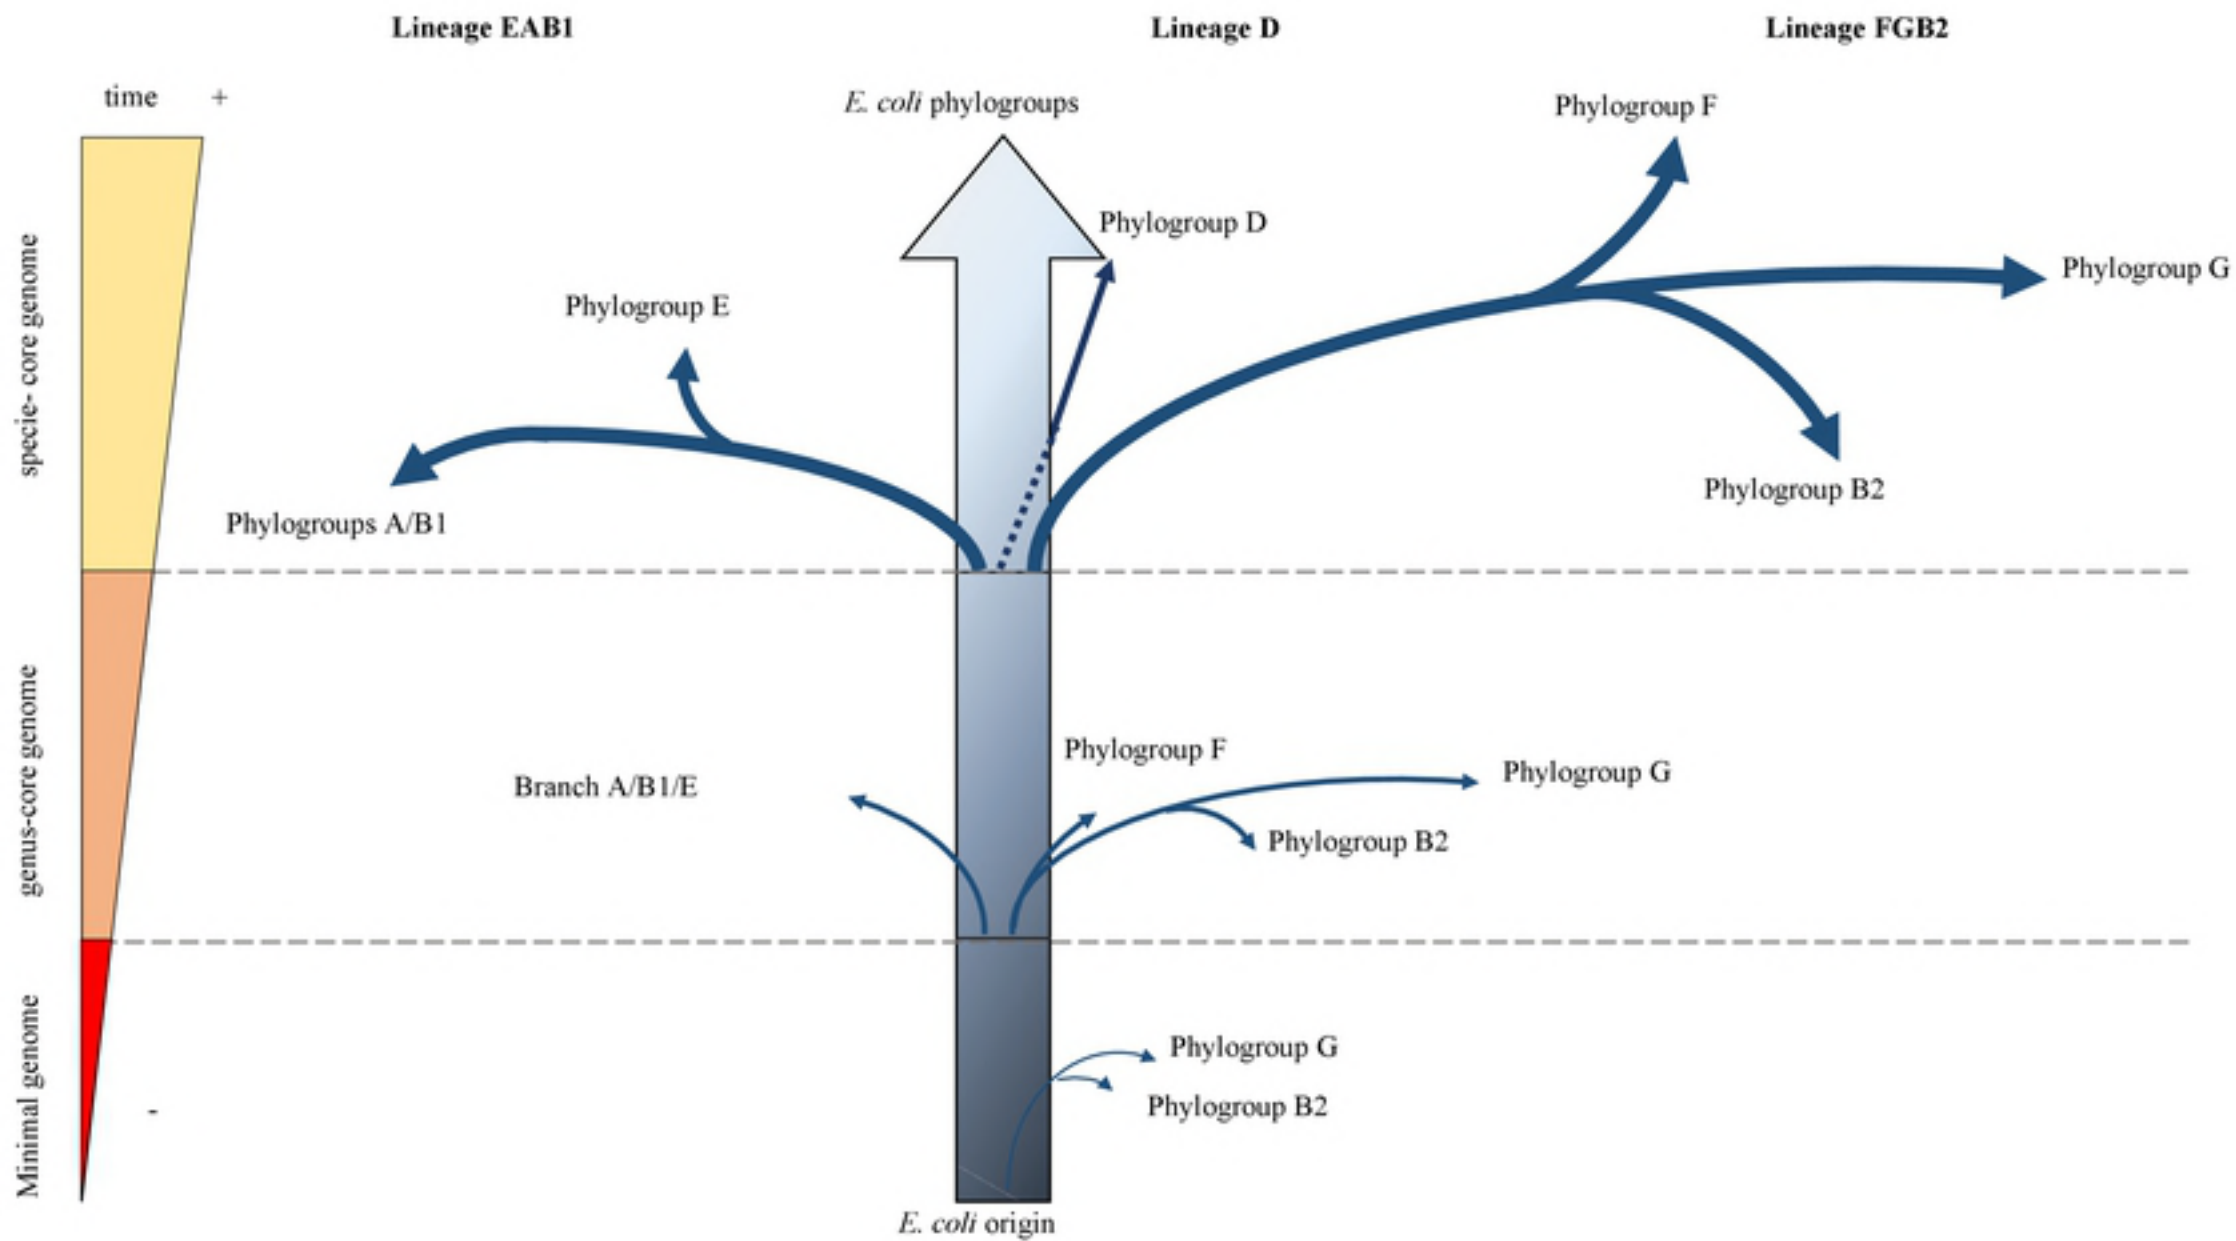

Figure 3

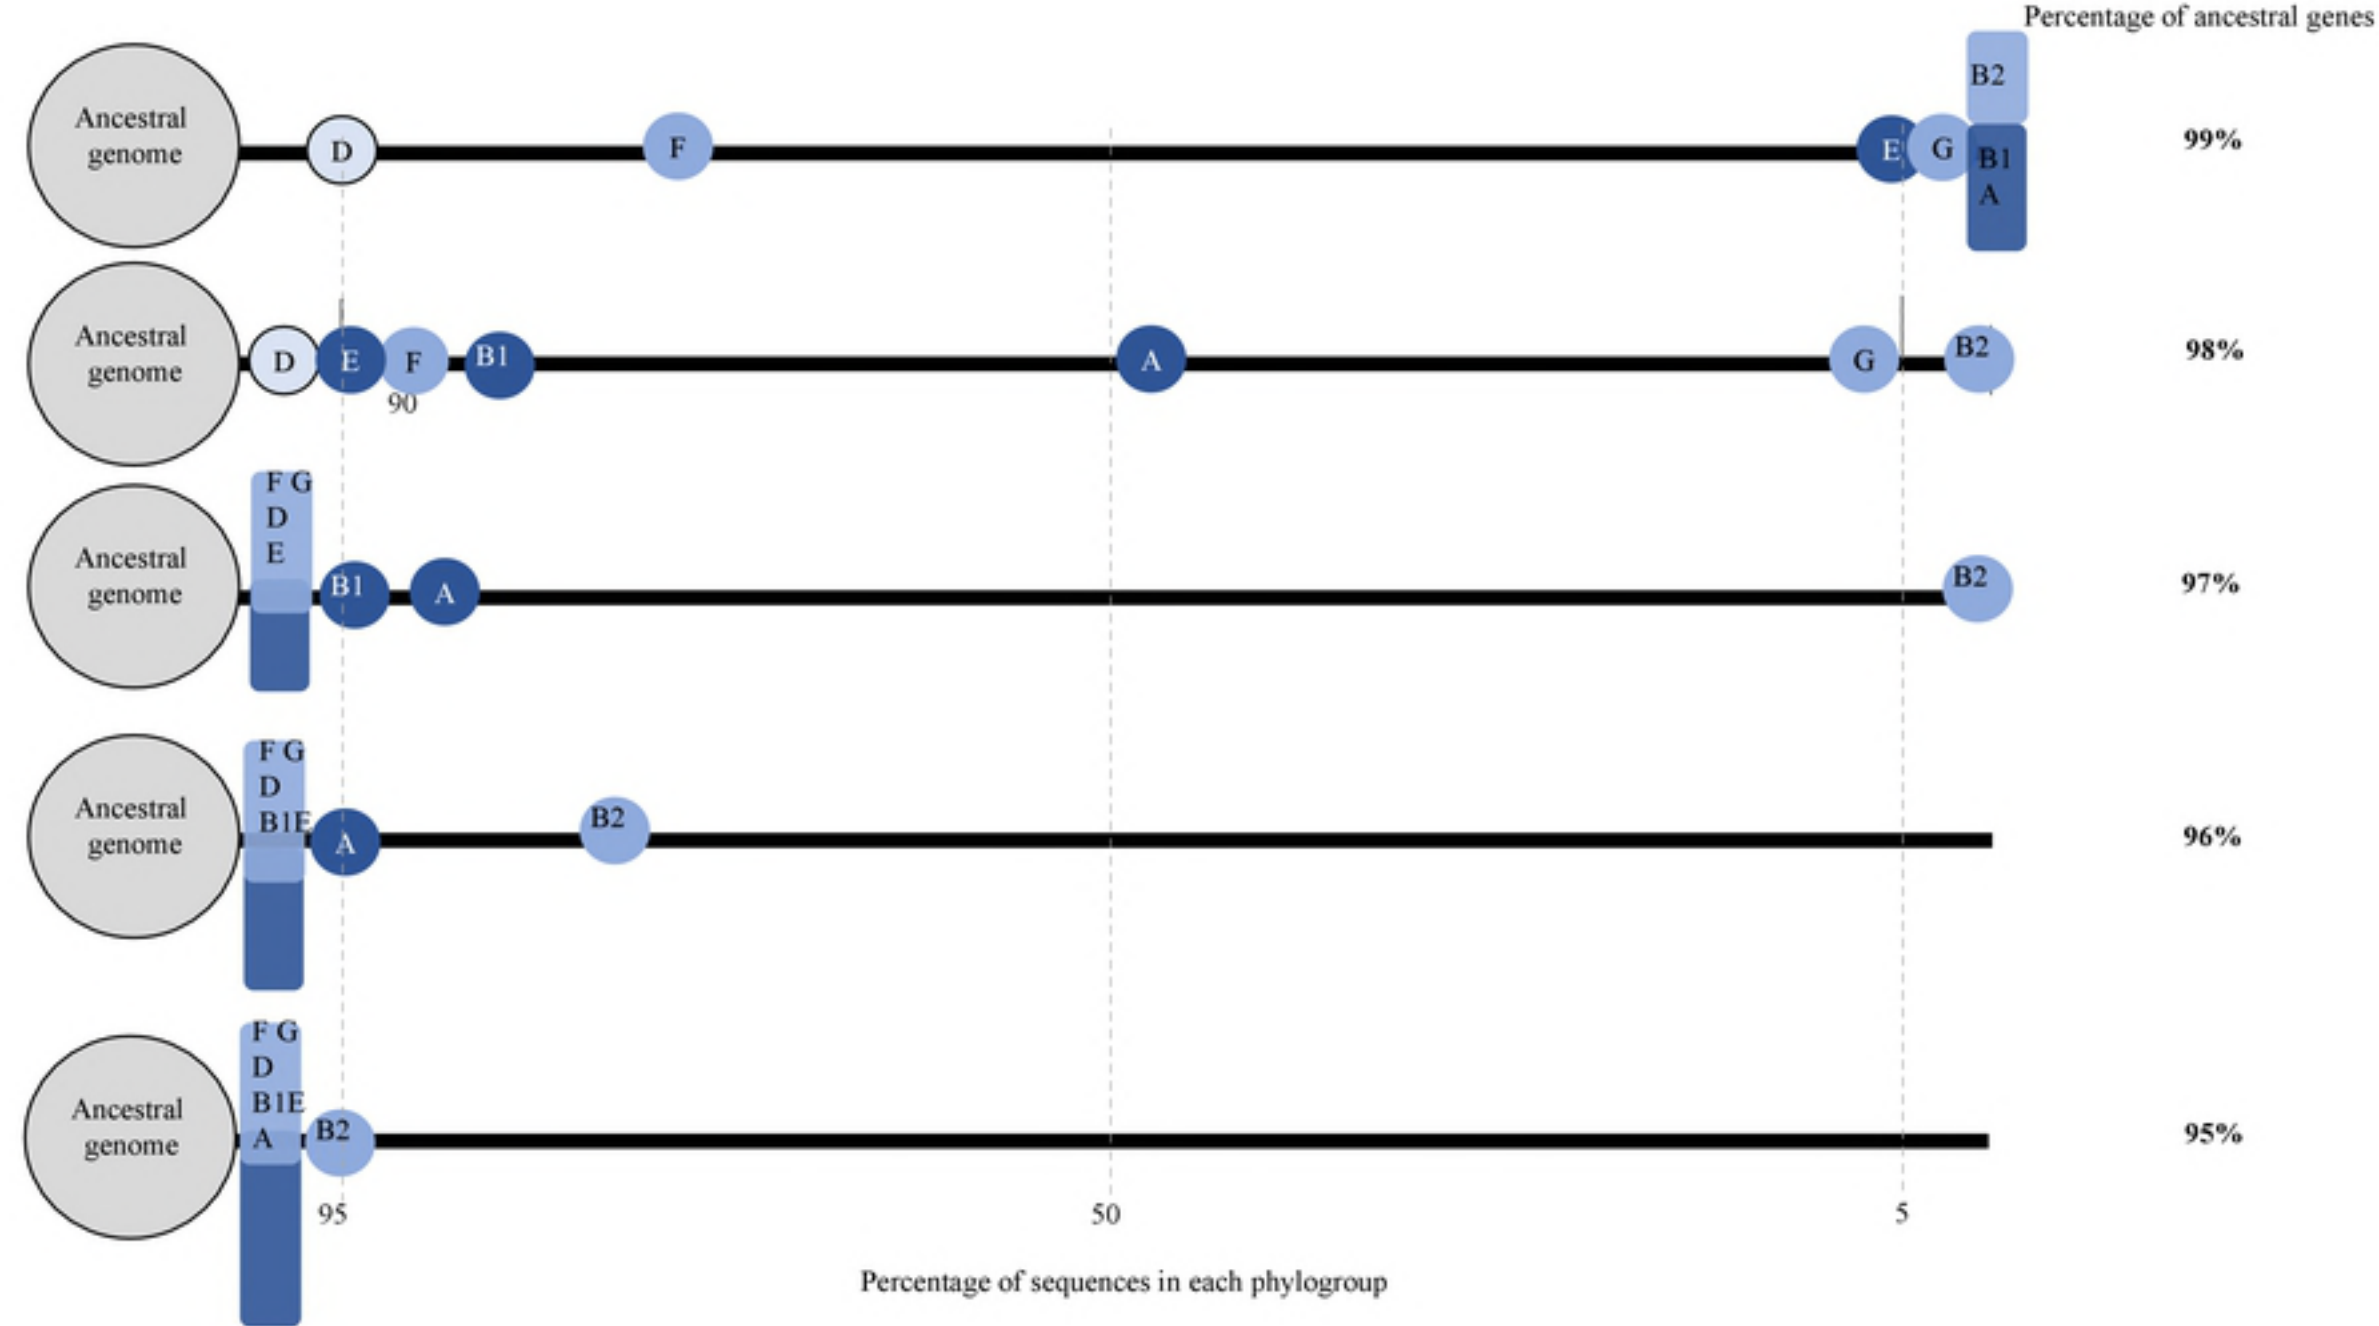

Figure 4

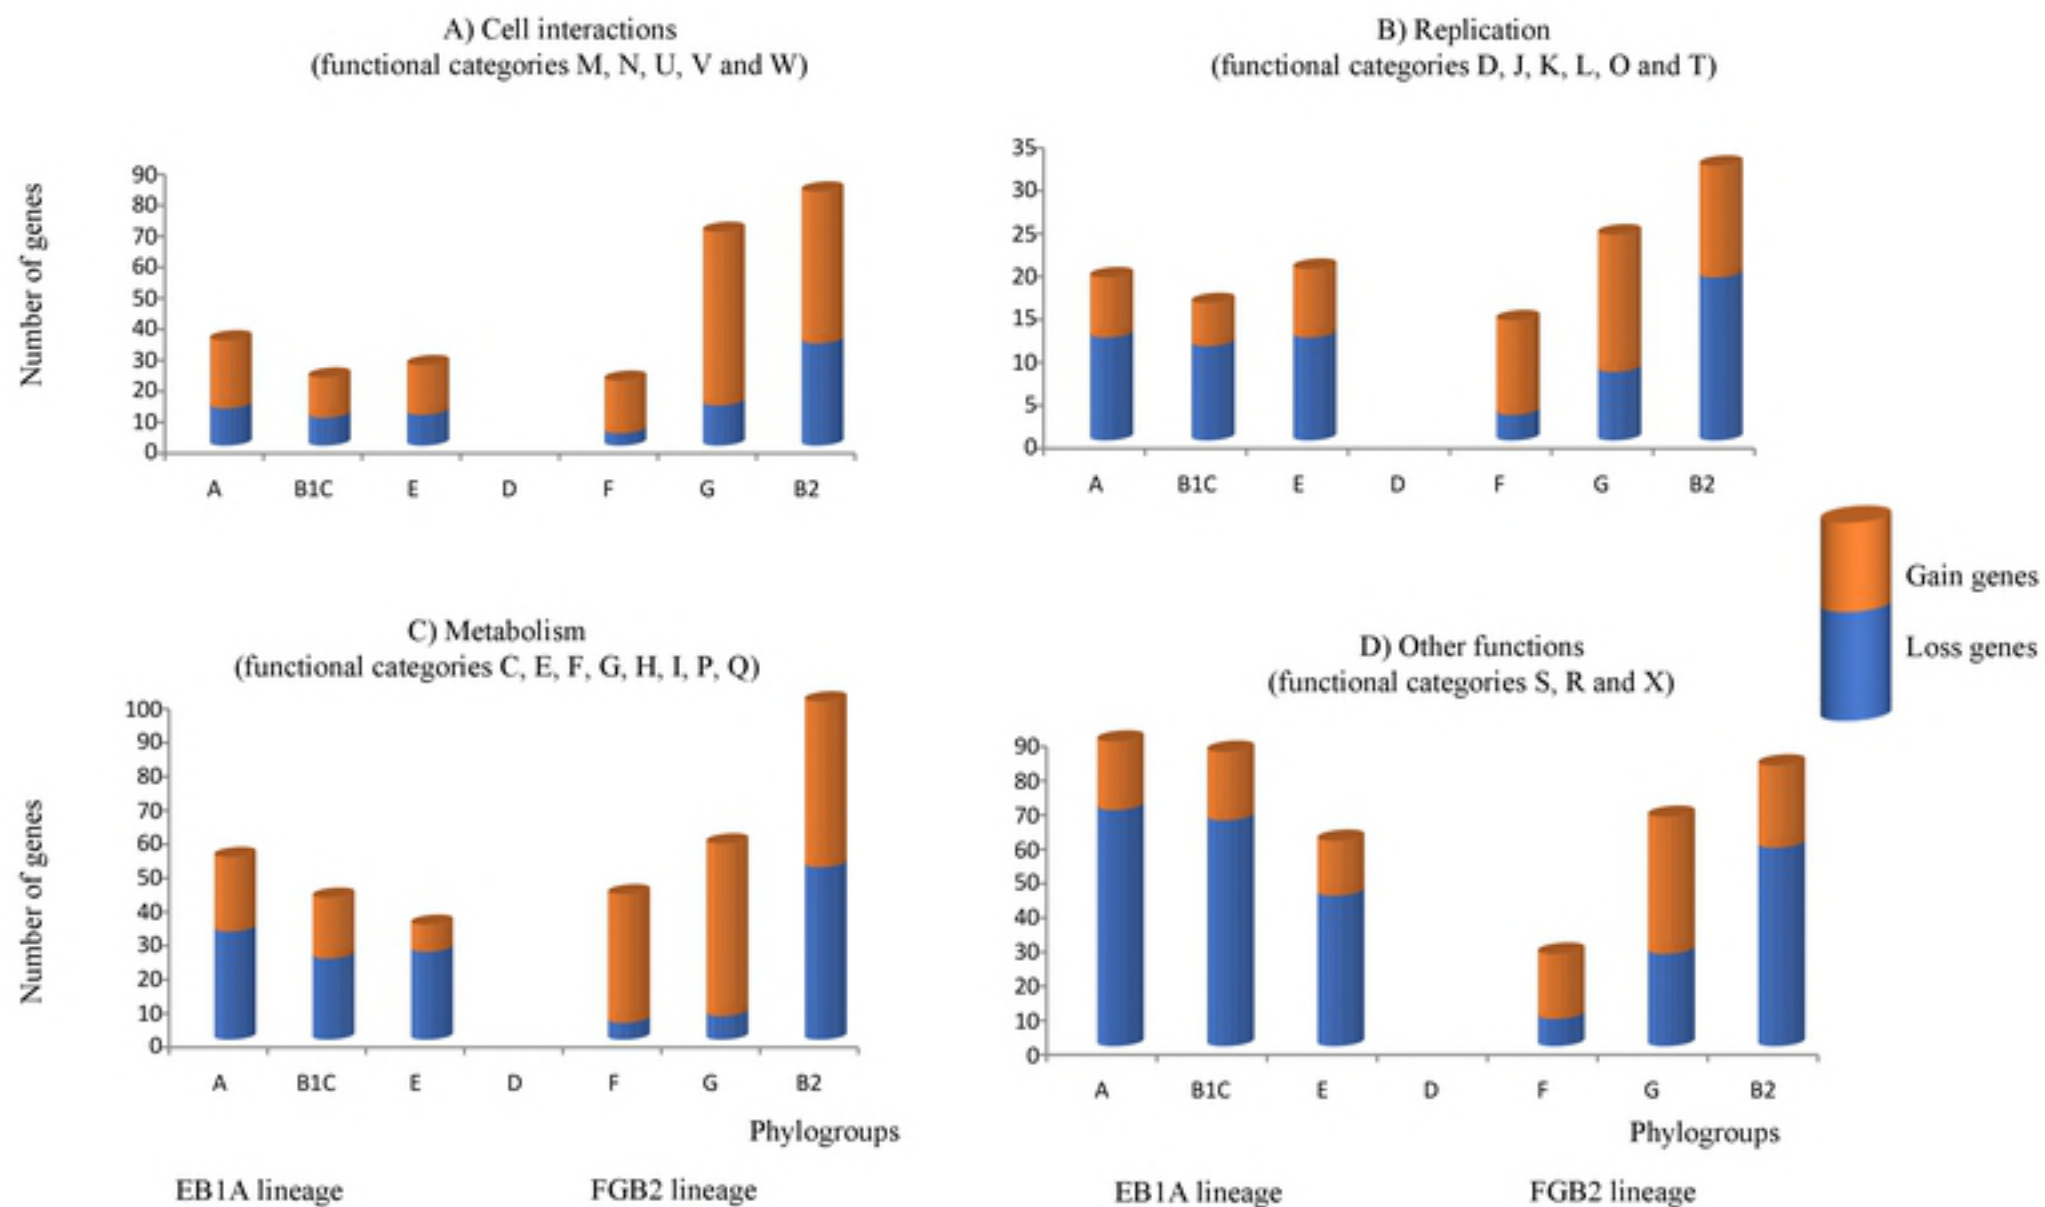

Figure 5

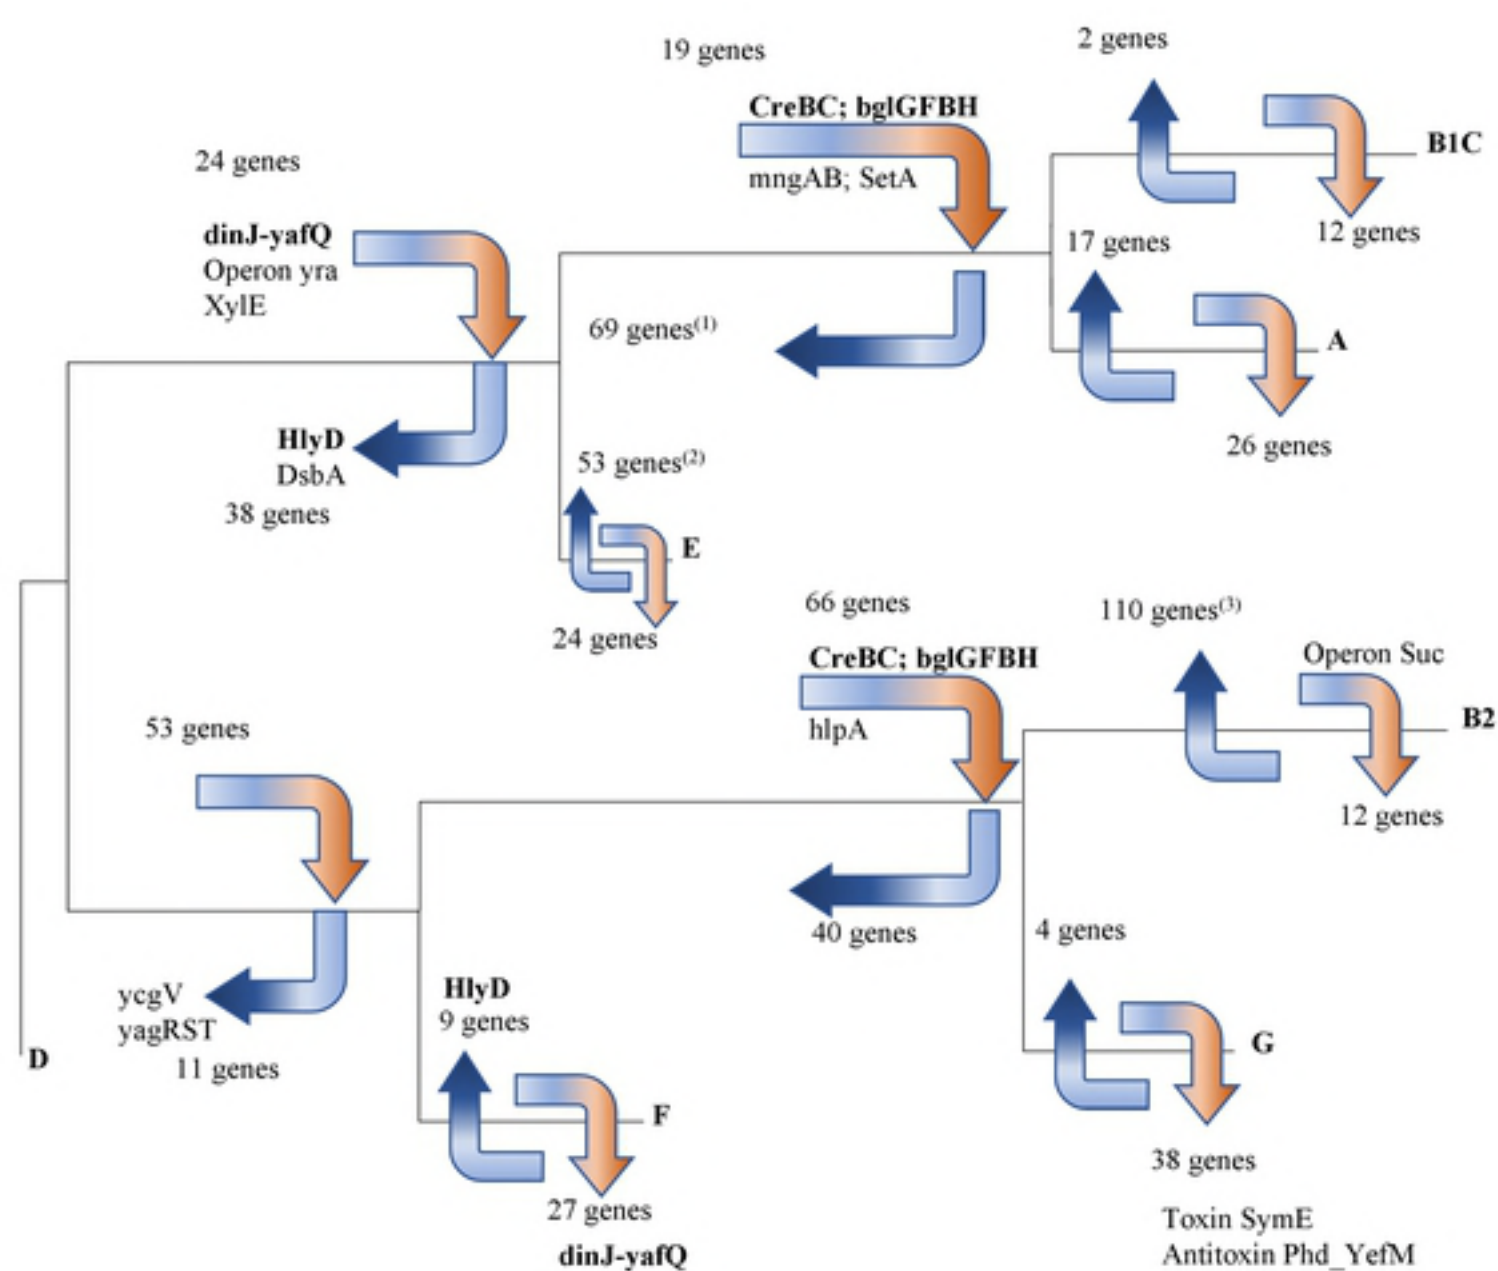

| (1) Gene/Locus_tag                 |
|------------------------------------|
| HmuV                               |
| ECSMS35_RS09855 to ECSMS35_RS09880 |
| ECSMS35_RS19185 to ECSMS35_RS19215 |
| (2) Gene/Locus_tag                 |
| ECO26_5203                         |
| dgo operon                         |
| Lyx                                |
| ECSMS35_RS05530                    |
| ECSMS35_RS12035 to ECSMS35_RS12055 |
| ECSMS35_RS20460                    |
| Sgb operon                         |
| Yia operon                         |
| (3) Gene                           |
| abg operon                         |
| ars operon                         |
| cyn operon                         |
| Ddp operon                         |
| glvG                               |
| hca operon                         |
| HicA                               |
| Hyf operon                         |
| melB                               |
| PemK                               |
| puu operon                         |
| rhuM                               |
| scpB                               |
| sfm operon                         |
| TisB                               |
| ycb operon                         |
| yfeT                               |
| yhiM                               |
| yncb                               |

Figure 6
